# Supplementary material for: Mn(OAc)3-mediated arylation–lactonization of alkenoic acids: synthesis of γ,γ-disubstituted butyrolactones
Source: Royal Society of Chemistry journal article supplement (doi:10.1039/c5ra04429d), 2015-01-01

## Electronic Supplementary Information for

### **Mn(OAc)<sub>3</sub>–mediated arylation–lactonization of alkenoic acids: synthesis of $\gamma$ , $\gamma$ -disubstituted butyrolactones**

Yuzhen Gao,<sup>a</sup> Jian Xu,<sup>a</sup> Pengbo Zhang,<sup>a</sup> Hua Fang,<sup>b</sup> Guo Tang,<sup>\*a</sup> and Yufen Zhao<sup>a</sup>

<sup>a</sup> Department of Chemistry, College of Chemistry and Chemical Engineering, and the Key Laboratory for Chemical Biology of Fujian Province, Xiamen University, Xiamen, Fujian 361005, China

Fax: (86)592-2185780; E-mail: [t12g21@xmu.edu.cn](mailto:t12g21@xmu.edu.cn)

<sup>b</sup> Third Institute of Oceanography, State Oceanic Administration, Xiamen, Fujian 361005, China

#### **Table of Contents**

|                                                                      |            |
|----------------------------------------------------------------------|------------|
| General and Experimental Section                                     | Page 2     |
| Spectral Data                                                        | Page 4-11  |
| <sup>1</sup> H NMR and <sup>13</sup> C NMR spectra for all compounds | Page 12-36 |

## Experimental Section

### General:

All reactions were carried out under nitrogen atmosphere. All reagents were purchased and used without further purification. All new compounds were further characterized by HRMS (ESI).

### Experimental procedure for the synthesis of $\text{Mn}(\text{OAc})_3 \cdot 2\text{H}_2\text{O}$ .

The  $\text{Mn}(\text{OAc})_3 \cdot 2\text{H}_2\text{O}$  was prepared by heating a mixture of 125 mL of acetic acid and 12 g of  $\text{Mn}(\text{OAc})_2 \cdot 4\text{H}_2\text{O}$  to reflux for 20 min, then slowly adding 2.0 g of  $\text{KMnO}_4$ . After refluxing for an additional 30 min, the mixture was cooled to room temperature and added a mixture of 20 mL of water. The manganic acetate was filtered off after 2 h, washed with cold acetic acid and diethyl ether, and then air dried.

### Experimental procedure for the synthesis of 4-argiopent-4-enoic acid.

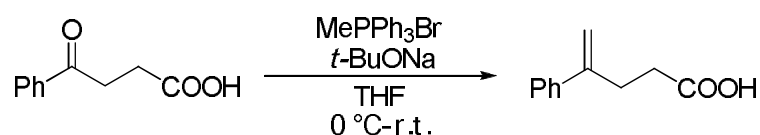

To a suspension of methyltriphenylphosphonium bromide (6.5 mmol) in THF (12 mL) was added sodium *t*-butoxide (13 mmol) at 0 °C. The mixture was then stirred for 30 min. 4-argio-4-oxobutanoic acid (5.0 mmol) was then added to the reaction mixture at 0 °C. The mixture was allowed to warm to room temperature, and then stirred for 16 h. After evaporation of THF, dichloromethane and 1 N NaOH were added. The aqueous layer was washed with dichloromethane. 12 N HCl was then added until pH of the aqueous layer was 2.0. The aqueous layer was then extracted with dichloromethane twice. The combined organic layer was dried over  $\text{MgSO}_4$ , filtered and concentrated in vacuo. The residue was purified by silica gel column chromatography using petroleum ether–AcOEt (10:1-5:1, v/v) as the eluent to give the corresponding products. 4-Phenylpent-4-enoic acid,  $^1\text{H}$  NMR (400 MHz,  $\text{CDCl}_3$ )  $\delta$  (ppm) 10.7 (br s, 1 H), 7.46 – 7.43 (m, 2H), 7.39 – 7.36 (m, 2H), 7.34 – 7.30 (m, 1H), 5.37 (s, 1H), 5.15 (s, 1H), 2.89 (t,  $J = 7.4$  Hz, 2H), 2.58 (t,  $J = 8.0$  Hz, 2H).  $^{13}\text{C}$  NMR (100 MHz,  $\text{CDCl}_3$ )  $\delta$  (ppm) 179.7, 146.8, 140.6, 128.6, 127.9, 126.3, 113.2, 33.2, 30.3.

### Experimental procedure for the synthesis of 2,2-dimethylpent-4-enoic acid

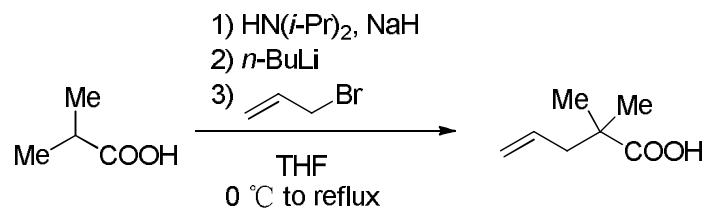

Isobutyric acid (880 mg, 10.0 mmol, 1.0 equiv) was added dropwise to a stirred suspension of NaH (60% dispersion in mineral oil, 480 mg, 12 mmol, 1.2 equiv) and diisopropylamine (1.11 g, 11 mmol, 1.1 equiv) in THF (20 mL). The resulting suspension was heated at reflux for ca 1 h and then cooled to 0°C for 15 min prior to the dropwise addition of  $n\text{-BuLi}$  (2.5 M in hexanes, 4.8 mL, 12 mmol, 1.2 equiv). The resulting suspension was stirred at 0°C for an additional 15 min and then at room temperature for 2 h. It was then cooled to 0°C and allyl bromide (1.20 g, 10 mmol, 1.0 equiv) was added dropwise to give an off-white suspension which was stirred at 0°C for 1 h and then at room temperature overnight. The suspension was then cooled with an ice-bath and the excess of NaH was neutralized with water (20 mL). The organic layer was washed with a 1 M NaOH solution (3 x 20 mL) and the combined aqueous layers were then extracted with  $\text{Et}_2\text{O}$  (2 x 20 mL). The aqueous layer was acidified by addition of a 1 M HCl solution until pH 3 and it was then extracted with ether (3 x 30 mL). The combined organic layers were dried over  $\text{MgSO}_4$ , filtered and the solvent was evaporated in vacuo. The crude product was purified by column chromatography (petroleum ether / $\text{EtOAc}$ = 15:1) to afford 2,2-dimethylpent-4-enoic acid (282 mg, 2.20 mmol, 22%) as a light yellow oil. 2,2-Dimethylpent-4-enoic acid,  $^1\text{H}$  NMR (400 MHz,  $\text{CDCl}_3$ )  $\delta$  (ppm) 10.2 (br s, 1 H), 5.85 – 5.74 (m, 1 H), 5.11 - 5.08 (m, 2 H), 2.31 (d, 2H,  $J$  = 7.4 Hz), 1.22 (s, 6 H).

#### Experimental procedure for the arylation–lactonization of alkenoic acids

An oven-dried Schlenk tube containing  $\text{Mn}(\text{OAc})_3 \cdot 2\text{H}_2\text{O}$  (0.9 mmol), alkenoic acids (0.30 mmol) and phenylboronic acid (0.45 mmol) were evacuated and purged with nitrogen three times.  $\text{CH}_3\text{COOH}$  (2 mL) was sequentially added to the system at room temperature. The reaction mixture was heated with stirring at 60 °C for 6 hours. The reaction solution was concentrated in vacuo and then added 15 mL of saturated sodium bicarbonate solution and extracted with  $\text{EtOAc}$  (3x10 mL). The combined organic layer was dried over  $\text{MgSO}_4$ , filtered and concentrated in vacuo. The residue was purified by silica gel column chromatography using petroleum ether– $\text{AcOEt}$  (15:1-5:1, v/v) as the eluent to give the corresponding products.

## Spectral Data

5-Benzyl-5-phenyldihydrofuran-2(3H)-one (**3a**) (CAS no: 66687-64-7).

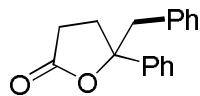

Colorless oil; 47 mg, 62% yield.  $^1\text{H}$  NMR (400 MHz,  $\text{CDCl}_3$ )  $\delta$  (ppm) 7.35 – 7.29 (m, 5H), 7.25 – 7.21 (m, 3H), 7.13 – 7.08 (m, 2H), 3.25 (d,  $J$  = 14.1 Hz, 1H), 3.11 (d,  $J$  = 14.1 Hz, 1H), 2.58 – 2.52 (m, 1H), 2.46 – 2.40 (m, 1H), 2.33 – 2.26 (m, 1H), 2.33 – 2.26 (m, 1H).  $^{13}\text{C}$  NMR (100 MHz,  $\text{CDCl}_3$ )  $\delta$  (ppm) 176.6, 143.6, 135.2, 130.8, 128.6, 128.4, 127.8, 127.2, 124.9, 89.1, 48.8, 33.1, 28.9. MS-ESI:  $m/z$  275.0 ( $[\text{M}+\text{Na}]^+$ ).

5-Benzyl-5-(4-fluorophenyl)dihydrofuran-2(3H)-one (**3b**).

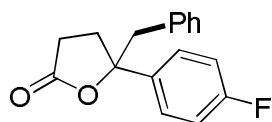

Colorless oil; 37 mg, 46% yield.  $^1\text{H}$  NMR (400 MHz,  $\text{CDCl}_3$ )  $\delta$  (ppm) 7.28 – 7.23 (m, 5H), 7.07 – 7.00 (m, 4H), 3.21 (d,  $J$  = 14.1 Hz, 1H), 3.10 (d,  $J$  = 14.0 Hz, 1H), 2.59 – 2.54 (m, 1H), 2.45 – 2.39 (m, 1H), 2.36 – 2.29 (m, 1H), 2.16 – 2.09 (m, 1H).  $^{13}\text{C}$  NMR (100 MHz,  $\text{CDCl}_3$ )  $\delta$  (ppm) 176.4, 162.3 (d,  $J$  = 247.1 Hz), 139.33 (d,  $J$  = 3.2 Hz), 134.9, 130.8, 128.5, 127.3, 126.8 (d,  $J$  = 8.1 Hz), 115.4 (d,  $J$  = 21.6 Hz), 88.7, 49.0, 33.3, 28.9. HRMS-ESI:  $m/z$  293.0953 ( $[\text{M}+\text{Na}]^+$ ,  $\text{C}_{17}\text{H}_{15}\text{FNaO}_2^+$  calcd. 293.0948).

5-Benzyl-5-(4-methoxyphenyl)dihydrofuran-2(3H)-one (**3c**) (CAS no: 101790-11-8).

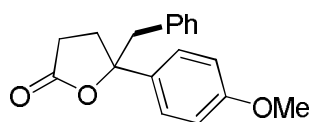

Colorless oil; 35 mg, 41% yield.  $^1\text{H}$  NMR (400 MHz,  $\text{CDCl}_3$ )  $\delta$  (ppm) 7.25 – 7.19 (m, 5H), 7.09 – 7.07 (m, 2H), 6.88 – 6.85 (m, 2H), 3.80 (s), 3.22 (d,  $J$  = 13.9 Hz, 1H), 3.11 (d,  $J$  = 14.0 Hz, 1H), 2.53 – 2.46 (m, 1H), 2.43 – 2.38 (m, 1H), 2.35 – 2.27 (m, 1H), 2.14 – 2.06 (m, 1H).  $^{13}\text{C}$  NMR (100 MHz,  $\text{CDCl}_3$ )  $\delta$  (ppm) 176.6, 159.2, 135.6, 135.3, 130.8, 128.4, 127.2, 126.3, 113.9, 89.1, 55.5, 49.0, 33.1, 29.0. MS-ESI:  $m/z$  305.0 ( $[\text{M}+\text{Na}]^+$ ).

Methyl 3-((2-(4-methoxyphenyl)-5-oxotetrahydrofuran-2-yl)methyl)benzoate (**3d**).

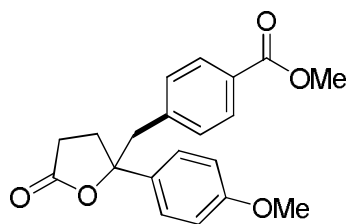

Colorless oil; 46 mg, 45% yield.  $^1\text{H}$  NMR (400 MHz,  $\text{CDCl}_3$ )  $\delta$  (ppm) 7.90 – 7.86 (m, 2H), 7.17 – 7.14 (m, 2H), 7.09 (d,  $J = 8.3$  Hz, 2H), 6.84 – 6.82 (m, 2H), 3.88 (s, 3H), 3.78 (s, 3H), 3.26 (d,  $J = 13.9$  Hz, 1H), 3.18 (d,  $J = 13.8$  Hz, 1H), 2.51 – 2.44 (m, 2H), 2.40 – 2.32 (m, 1H), 2.28 – 2.20 (m, 1H).  $^{13}\text{C}$  NMR (100 MHz,  $\text{CDCl}_3$ )  $\delta$  (ppm) 176.4, 167.1, 159.3, 140.7, 134.6, 130.8, 129.5, 129.0, 126.2, 113.9, 88.8, 55.4, 52.2, 48.9, 33.7, 28.9. HRMS-ESI:  $m/z$  363.1206 ( $[\text{M}+\text{Na}]^+$ ,  $\text{C}_{20}\text{H}_{20}\text{NaO}_5^+$  calcd. 363.1203).

*5-(Naphthalen-1-ylmethyl)-5-phenyldihydrofuran-2(3H)-one (3e).*

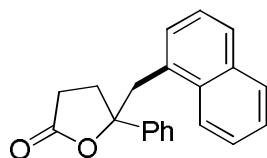

Yellow cream; 25 mg, 28% yield.  $^1\text{H}$  NMR (400 MHz,  $\text{CDCl}_3$ )  $\delta$  (ppm) 8.06 (d,  $J = 8.2$  Hz, 1H), 7.90 (d,  $J = 7.8$  Hz, 1H), 7.84 (d,  $J = 7.9$  Hz, 1H), 7.57 – 7.35 (m, 9H), 3.77 (d,  $J = 14.7$  Hz, 1H), 3.71 (d,  $J = 14.7$  Hz, 1H), 2.65 – 2.59 (m, 1H), 2.50 – 2.45 (m, 1H), 2.30 – 2.23 (m, 1H), 1.96 – 1.90 (m, 1H).  $^{13}\text{C}$  NMR (100 MHz,  $\text{CDCl}_3$ )  $\delta$  (ppm) 176.4, 144.1, 134.0, 133.0, 131.5, 129.9, 129.0, 128.7, 128.3, 128.0, 126.3, 125.8, 125.5, 124.9, 124.1, 89.7, 44.4, 32.9, 29.1. HRMS-ESI:  $m/z$  325.1201 ( $[\text{M}+\text{Na}]^+$ ,  $\text{C}_{21}\text{H}_{18}\text{NaO}_2^+$  calcd. 325.1199).

*5-(4-Methylbenzyl)-5-phenyldihydrofuran-2(3H)-one (3f).*

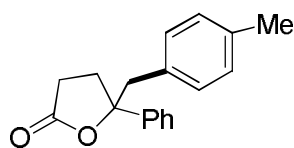

Colorless oil; 40 mg, 50% yield.  $^1\text{H}$  NMR (400 MHz,  $\text{CDCl}_3$ )  $\delta$  (ppm) 7.40 – 7.26 (m, 5H), 7.08 – 7.01 (m, 4H), 3.23 (d,  $J = 14.1$  Hz, 1H), 3.07 (d,  $J = 14.1$  Hz, 1H), 2.60 – 2.53 (m, 1H), 2.46 – 2.39 (m, 1H), 2.34 – 2.24 (m, 4H), 2.09 – 2.01 (m, 1H).  $^{13}\text{C}$  NMR (100 MHz,  $\text{CDCl}_3$ )  $\delta$  (ppm) 176.7, 143.9, 136.9, 132.1, 130.7, 129.2, 128.6, 127.8, 124.9, 89.2, 48.5, 33.0, 29.0, 21.2. HRMS-ESI:  $m/z$  267.1380 ( $[\text{M}+\text{H}]^+$ ,  $\text{C}_{18}\text{H}_{19}\text{O}_2^+$  calcd. 267.1380).

*5-(3-Methylbenzyl)-5-phenyldihydrofuran-2(3H)-one (3g).*

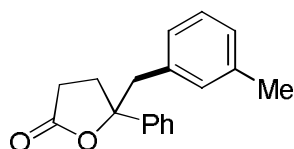

Colorless oil; 42 mg, 53% yield.  $^1\text{H}$  NMR (400 MHz,  $\text{CDCl}_3$ )  $\delta$  (ppm) 7.39 – 7.26 (m, 5H), 7.14 (t,  $J = 7.5$  Hz, 1H), 7.05 (d,  $J = 7.6$  Hz, 1H), 6.94 – 6.90 (m, 2H), 3.23 (d,  $J = 14.1$  Hz, 1H), 3.07 (d,  $J = 14.0$  Hz, 1H), 2.61 – 2.53 (m, 1H), 2.47 – 2.40 (m, 1H), 2.35 – 2.23 (m, 4H), 2.10 – 2.01 (m, 1H).  $^{13}\text{C}$  NMR (100 MHz,  $\text{CDCl}_3$ )  $\delta$  (ppm) 176.7, 143.9, 138.0, 135.1, 131.7, 128.6, 128.3, 128.0, 127.8, 124.9, 89.1, 48.8, 33.0, 29.0, 21.5. HRMS-ESI:  $m/z$  267.1384 ( $[\text{M}+\text{H}]^+$ ,  $\text{C}_{18}\text{H}_{19}\text{O}_2^+$  calcd. 267.1380).

*5-(2-Methylbenzyl)-5-phenyldihydrofuran-2(3H)-one (3h).*

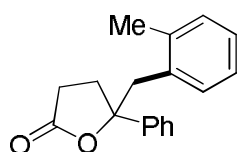

Colorless oil. 35 mg, 44% yield.  $^1\text{H}$  NMR (400 MHz,  $\text{CDCl}_3$ )  $\delta$  (ppm) 7.38 – 7.29 (m, 5H), 7.18 – 7.09 (m, 4H), 3.28 (d,  $J = 14.5$  Hz, 1H), 3.19 (d,  $J = 14.4$  Hz, 1H), 2.62 – 2.55 (m, 1H), 2.52 – 2.45 (m, 1H), 2.36 – 2.27 (m, 1H), 2.20 – 2.12 (m, 4H).  $^{13}\text{C}$  NMR (100 MHz,  $\text{CDCl}_3$ )  $\delta$  (ppm) 176.4, 143.8, 137.9, 133.7, 131.7, 130.8, 128.6, 127.9, 127.4, 125.9, 124.9, 89.8, 45.0, 33.1, 28.9, 20.1. HRMS-ESI:  $m/z$  289.1202 ( $[\text{M}+\text{Na}]^+$ ,  $\text{C}_{18}\text{H}_{19}\text{O}_2^+$  calcd. 289.1199).

*5-(2,3-Dimethylbenzyl)-5-phenyldihydrofuran-2(3H)-one (3i).*

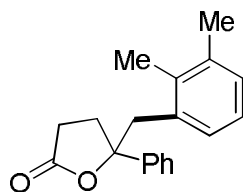

White solid; mp 111–112 °C; 31 mg, 37% yield.  $^1\text{H}$  NMR (400 MHz,  $\text{CDCl}_3$ )  $\delta$  (ppm) 7.34 – 7.25 (m, 5H), 7.05 – 6.95 (m, 3H), 3.30 (d,  $J = 14.5$  Hz, 1H), 3.19 (d,  $J = 14.5$  Hz, 1H), 2.60 – 2.53 (m, 1H), 2.45 – 2.38 (m, 1H), 2.29 – 2.21 (m, 4H), 2.09 – 2.00 (m, 4H).  $^{13}\text{C}$  NMR (100 MHz,  $\text{CDCl}_3$ )  $\delta$  (ppm) 176.4, 144.2, 137.5, 136.6, 133.5, 129.6, 129.1, 128.6, 127.8, 125.4, 124.9, 89.8, 45.6, 33.0, 28.9, 21.1, 16.1. HRMS-ESI:  $m/z$  303.1357 ( $[\text{M}+\text{Na}]^+$ ,  $\text{C}_{19}\text{H}_{20}\text{NaO}_2^+$  calcd. 303.1356).

*5-(2,6-Dimethylbenzyl)-5-phenyldihydrofuran-2(3H)-one(3j)*

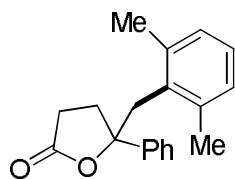

Colorless oil. 18 mg, 22% yield.  $^1\text{H}$  NMR (400 MHz,  $\text{CDCl}_3$ )  $\delta$  (ppm) 7.47 – 7.40 (m, 4H), 7.37 – 7.34 (m, 1H), 7.12 – 7.04 (m, 3H), 3.42 (d,  $J = 15.1$  Hz, 1H), 3.25 (d,  $J = 15.1$  Hz, 1H), 2.53 – 2.44 (m, 2H), 2.35 (s, 6H), 2.30 – 2.13 (m, 2H).  $^{13}\text{C}$  NMR (100 MHz,  $\text{CDCl}_3$ )  $\delta$  (ppm) 176.1, 144.4, 138.6, 132.8, 128.8, 128.0, 127.2, 125.0, 90.8, 41.3, 32.6, 28.9, 21.3. HRMS-ESI:  $m/z$  303.1360 ( $[\text{M}+\text{Na}]^+$ ,  $\text{C}_{19}\text{H}_{20}\text{NaO}_2^+$  calcd. 303.1356).

5-(2-Fluorobenzyl)-5-phenyldihydrofuran-2(3H)-one (CSA no: 1638127-88-4) (**3k**).

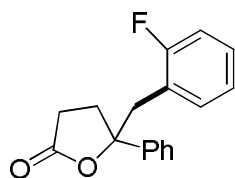

Colorless oil. 51 mg, 63% yield.  $^1\text{H}$  NMR (400 MHz,  $\text{CDCl}_3$ )  $\delta$  (ppm) 7.42 – 7.29 (m, 5H), 7.26 – 7.21 (m, 1H), 7.13 – 7.09 (m, 1H), 7.05 – 7.00 (m, 2H), 3.35 (d,  $J = 14.2$  Hz, 1H), 3.23 (d,  $J = 14.2$  Hz, 1H), 2.63 – 2.55 (m, 1H), 2.52 – 2.45 (m, 1H), 2.42 – 2.34 (m, 1H), 2.29 – 2.21 (m, 1H).  $^{13}\text{C}$  NMR (100 MHz,  $\text{CDCl}_3$ )  $\delta$  (ppm) 176.4, 161.5 (d,  $J = 245.4$  Hz), 143.3, 133.23 (d,  $J = 3.9$  Hz), 129.2 (d,  $J = 8.2$  Hz), 128.6, 128.0, 124.9, 124.17 (d,  $J = 3.4$  Hz), 122.3 (d,  $J = 15.2$  Hz), 115.35 (d,  $J = 22.7$  Hz), 89.0, 40.7, 33.2, 28.9. MS-ESI:  $m/z$  293.0 ( $[\text{M}+\text{Na}]^+$ ).

5-(4-Fluorobenzyl)-5-phenyldihydrofuran-2(3H)-one (**3l**).

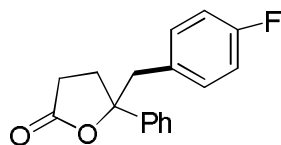

Colorless oil; 47 mg, 60% yield.  $^1\text{H}$  NMR (400 MHz,  $\text{CDCl}_3$ )  $\delta$  (ppm) 7.35 – 7.26 (m, 5H), 7.04 – 7.00 (m, 2H), 6.92 – 6.88 (m, 2H), 3.21 (d,  $J = 14.2$  Hz, 1H), 3.11 (d,  $J = 14.2$  Hz, 1H), 2.57 – 2.44 (m, 2H), 2.39 – 2.30 (m, 1H), 2.23 – 2.15 (m, 1H).  $^{13}\text{C}$  NMR (100 MHz,  $\text{CDCl}_3$ )  $\delta$  (ppm) 176.4, 162.1 (d,  $J = 245.2$  Hz), 143.1, 132.24 (d,  $J = 8.0$  Hz), 130.9 (d,  $J = 3.5$  Hz), 128.6, 127.9, 124.9, 115.2 (d,  $J = 21.2$  Hz), 88.9, 47.9, 33.4, 28.8. HRMS-ESI:  $m/z$  271.1130 ( $[\text{M}+\text{H}]^+$ ,  $\text{C}_{17}\text{H}_{16}\text{FO}_2^+$  calcd. 271.1129).

5-(2-Chlorobenzyl)-5-phenyldihydrofuran-2(3H)-one (**3m**).

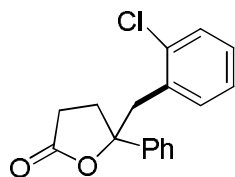

Colorless oil. 52 mg, 61% yield.  $^1\text{H}$  NMR (400 MHz,  $\text{CDCl}_3$ )  $\delta$  (ppm) 7.45 – 7.31 (m, 6H), 7.25 – 7.15 (m, 3H), 3.56 (d,  $J = 14.5$  Hz, 1H), 3.32 (d,  $J = 14.5$  Hz, 1H), 2.64 – 2.56 (m, 1H), 2.51 – 2.44 (m, 1H), 2.40 – 2.32 (m, 1H), 2.25 – 2.17 (m, 1H).  $^{13}\text{C}$  NMR (100 MHz,  $\text{CDCl}_3$ )  $\delta$  (ppm) 176.5, 143.6, 135.3, 133.3, 133.2, 129.7, 128.8, 128.7, 128.0, 127.0, 124.9, 89.3, 44.4, 32.9, 29.0. HRMS-ESI:  $m/z$  287.0836 ( $[\text{M}+\text{H}]^+$ ,  $\text{C}_{17}\text{H}_{16}\text{ClO}_2^+$  calcd. 287.0833).

5-(4-Chlorobenzyl)-5-phenyldihydrofuran-2(3H)-one (**n**).

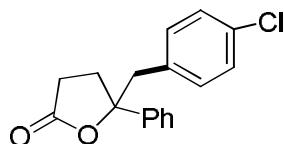

Colorless oil; 54 mg, 63% yield.  $^1\text{H}$  NMR (400 MHz,  $\text{CDCl}_3$ )  $\delta$  (ppm) 7.38 – 7.28 (m, 5H), 7.22 – 7.20 (m, 2H), 7.02 – 7.00 (m, 2H), 3.23 (d,  $J = 14.2$  Hz, 1H), 3.14 (d,  $J = 14.1$  Hz, 1H), 2.58 – 2.47 (m, 2H), 2.43 – 2.34 (m, 1H), 2.29 – 2.21 (m, 1H).  $^{13}\text{C}$  NMR (100 MHz,  $\text{CDCl}_3$ )  $\delta$  (ppm) 176.3, 142.9, 133.7, 133.2, 132.1, 128.6, 128.5, 128.0, 124.9, 88.8, 48.1, 33.5, 28.8. HRMS-ESI:  $m/z$  287.0834 ( $[\text{M}+\text{H}]^+$ ,  $\text{C}_{17}\text{H}_{16}\text{ClO}_2^+$  calcd. 287.0833).

5-(4-Bromobenzyl)-5-phenyldihydrofuran-2(3H)-one (**3o**).

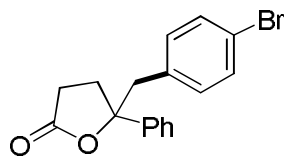

Yellow cream; 63 mg, 63% yield.  $^1\text{H}$  NMR (400 MHz,  $\text{CDCl}_3$ )  $\delta$  (ppm) 7.38 – 7.35 (m, 4H), 7.33 – 7.28 (m, 3H), 6.96 – 6.93 (m, 2H), 3.22 (d,  $J = 14.1$  Hz, 1H), 3.13 (d,  $J = 14.0$  Hz, 1H), 2.59 – 2.47 (m, 2H), 2.43 – 2.35 (m, 1H), 2.30 – 2.22 (m, 1H).  $^{13}\text{C}$  NMR (100 MHz,  $\text{CDCl}_3$ )  $\delta$  (ppm) 176.5, 142.8, 134.1, 132.4, 131.5, 128.7, 128.0, 124.9, 121.4, 88.9, 48.2, 33.5, 28.8. HRMS-ESI:  $m/z$  353.0151 ( $[\text{M}+\text{Na}]^+$ ,  $\text{C}_{17}\text{H}_{15}\text{BrNaO}_2^+$  calcd. 353.0148).

5-(4-Methoxybenzyl)-5-phenyldihydrofuran-2(3H)-one (**3p**).



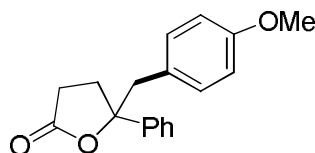

Colorless oil; 36 mg, 42% yield.  $^1\text{H}$  NMR (400 MHz,  $\text{CDCl}_3$ )  $\delta$  (ppm) 7.37 – 7.23 (m, 5H), 7.06 – 6.99 (m, 2H), 6.80 – 6.76 (m, 2H), 3.76 (s, 3H), 3.19 (d,  $J = 14.2$  Hz, 1H), 3.04 (d,  $J = 14.2$  Hz, 1H), 2.58 – 2.51 (m, 1H), 2.465 – 2.38 (m, 1H), 2.34 – 2.26 (m, 1H), 2.11 – 2.02 (m, 1H).  $^{13}\text{C}$  NMR (100 MHz,  $\text{CDCl}_3$ )  $\delta$  (ppm) 176.7, 158.9, 143.8, 131.8, 128.6, 127.8, 127.2, 124.9, 113.9, 89.2, 55.3, 48.0, 33.0, 29.0. HRMS-ESI:  $m/z$  305.1147 ( $[\text{M}+\text{Na}]^+$ ,  $\text{C}_{18}\text{H}_{18}\text{NaO}_3^+$  calcd. 305.1148).

*5-Phenyl-5-(4-(trifluoromethoxy)benzyl)dihydrofuran-2(3H)-one (3q).*

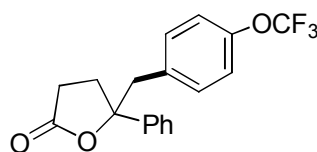

Colorless oil; 55 mg, 55% yield.  $^1\text{H}$  NMR (400 MHz,  $\text{CDCl}_3$ )  $\delta$  (ppm) 7.35 – 7.26 (m, 5H), 7.14 – 7.03 (m, 4H), 3.24 (d,  $J = 14.1$  Hz, 1H), 3.15 (d,  $J = 14.1$  Hz, 1H), 2.56 – 2.46 (m, 2H), 2.41 – 2.32 (m, 1H), 2.28 – 2.20 (m, 1H).  $^{13}\text{C}$  NMR (100 MHz,  $\text{CDCl}_3$ )  $\delta$  (ppm) 176.3, 148.5, 142.8, 134.0, 132.1, 128.6, 128.0, 124.9, 120.7, 88.8, 48.0, 33.6, 28.8. HRMS-ESI:  $m/z$  337.1049 ( $[\text{M}+\text{H}]^+$ ,  $\text{C}_{18}\text{H}_{16}\text{F}_3\text{O}_3^+$  calcd. 337.1046).

*5-Phenyl-5-(4-(trifluoromethyl)benzyl)dihydrofuran-2(3H)-one (3r).*

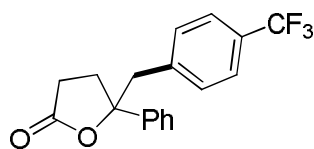

Colorless oil; 59 mg, 61% yield.  $^1\text{H}$  NMR (400 MHz,  $\text{CDCl}_3$ )  $\delta$  (ppm) 7.45 (d,  $J = 8.0$  Hz, 2H), 7.36 – 7.26 (m, 5H), 7.15 (d,  $J = 8.0$  Hz, 2H), 3.30 (d,  $J = 14.0$  Hz, 1H), 3.22 (d,  $J = 14.0$  Hz, 1H), 2.55 – 2.51 (m, 2H), 2.43 – 2.23 (m, 2H).  $^{13}\text{C}$  NMR (100 MHz,  $\text{CDCl}_3$ )  $\delta$  (ppm) 176.3, 142.6, 139.3, 131.1, 128.7, 128.1, 125.2 (q,  $J = 7.5$  Hz), 124.9, 88.7, 48.5, 33.8, 28.7. HRMS-ESI:  $m/z$  343.0910 ( $[\text{M}+\text{Na}]^+$ ,  $\text{C}_{18}\text{H}_{15}\text{F}_3\text{NaO}_2^+$  calcd. 343.0916).

*5-(3-Nitrobenzyl)-5-phenyldihydrofuran-2(3H)-one (3s).*

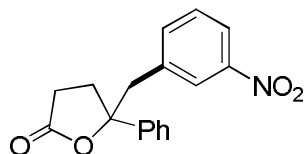

Yellow oil; 53 mg, 60% yield.  $^1\text{H}$  NMR (400 MHz,  $\text{CDCl}_3$ )  $\delta$  (ppm) 8.06 – 8.03 (m, 1H), 7.82 (s,

1H), 7.39 – 7.29 (m, 7H), 3.37 (d,  $J = 14.2$  Hz, 1H), 3.34 (d,  $J = 14.2$  Hz, 1H), 2.66 – 2.55 (m, 2H), 2.48 – 2.41 (m, 2H).  $^{13}\text{C}$  NMR (100 MHz,  $\text{CDCl}_3$ )  $\delta$  (ppm) 176.2, 148.0, 141.8, 137.2, 136.9, 129.1, 128.8, 128.3, 125.3, 124.9, 122.2, 88.6, 48.2, 34.2, 28.6. HRMS-ESI:  $m/z$  320.0889 ( $[\text{M}+\text{Na}]^+$ ,  $\text{C}_{17}\text{H}_{15}\text{NNaO}_4^+$  calcd. 320.0893).

*4-((5-Oxo-2-phenyltetrahydrofuran-2-yl)methyl)benzaldehyde (3t).*

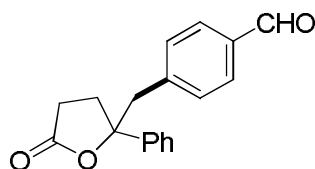

Colorless oil; 48 mg, 57% yield.  $^1\text{H}$  NMR (400 MHz,  $\text{CDCl}_3$ )  $\delta$  (ppm) 9.94 (s, 1H), 7.72 – 7.70 (m, 2H), 7.35 – 7.25 (m, 5H), 7.20 (d,  $J = 8.1$  Hz, 2H), 3.33 (d,  $J = 13.9$  Hz, 1H), 3.26 (d,  $J = 13.9$  Hz, 1H), 2.58 – 2.53 (m, 2H), 2.44 – 2.25 (m, 2H).  $^{13}\text{C}$  NMR (100 MHz,  $\text{CDCl}_3$ )  $\delta$  (ppm) 192.1, 176.2, 142.5, 142.3, 135.3, 131.4, 129.6, 128.7, 128.1, 124.9, 88.7, 48.8, 33.9, 28.7. HRMS-ESI:  $m/z$  303.0992 ( $[\text{M}+\text{Na}]^+$ ,  $\text{C}_{18}\text{H}_{16}\text{NaO}_3^+$  calcd. 303.0992).

*5-(4-Acetylbenzyl)-5-phenyldihydrofuran-2(3H)-one (3u).*

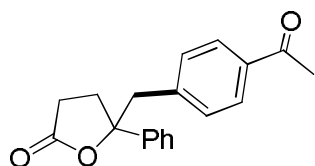

White solid; mp 124–125 °C; 53 mg, 60% yield.  $^1\text{H}$  NMR (400 MHz,  $\text{CDCl}_3$ )  $\delta$  (ppm) 7.81 (d,  $J = 8.2$  Hz, 2H), 7.36 – 7.27 (m, 5H), 7.15 (d,  $J = 8.2$  Hz, 2H), 3.31 (d,  $J = 13.9$  Hz, 1H), 3.22 (d,  $J = 13.9$  Hz, 1H), 2.56 (s, 3H), 2.55 – 2.49 (m, 2H), 2.42 – 2.33 (m, 1H), 2.28 – 2.20 (m, 1H).  $^{13}\text{C}$  NMR (100 MHz,  $\text{CDCl}_3$ )  $\delta$  (ppm) 198.0, 176.2, 142.8, 140.8, 136.1, 131.0, 128.7, 128.4, 128.1, 124.9, 88.8, 48.7, 33.8, 28.8, 26.7. HRMS-ESI:  $m/z$  317.1153 ( $[\text{M}+\text{Na}]^+$ ,  $\text{C}_{19}\text{H}_{18}\text{NaO}_3^+$  calcd. 317.1148).

*5-Benzylidihydrofuran-2(3H)-one (3v) (CAS no: 21175-42-8).*

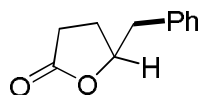

Colorless oil. 14 mg, 26% yield.  $^1\text{H}$  NMR (400 MHz,  $\text{CDCl}_3$ )  $\delta$  (ppm) 7.34 – 7.30 (m, 2H), 7.27 – 7.22 (m, 3H), 4.76 – 4.70 (m, 1H), 3.06 (m, 1H), 2.92 (m, 1H), 2.50 – 2.33 (m, 2H), 2.29 – 2.20 (m, 1H), 2.00 – 1.90 (m, 1H).  $^{13}\text{C}$  NMR (100 MHz,  $\text{CDCl}_3$ )  $\delta$  (ppm) 177.2, 136.1, 129.6, 128.8,

127.2, 81.0, 41.5, 28.8, 27.3. MS-ESI:  $m/z$  199.0 ( $[M+Na]^+$ ).

*5-Benzyl-3,3-dimethyldihydrofuran-2(3H)-one (3w)* (CAS no: 1251739-93-1)

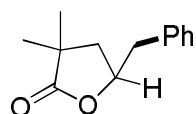

Colorless oil. 20 mg, 32% yield.  $^1H$  NMR (400 MHz,  $CDCl_3$ )  $\delta$  (ppm) 7.33 – 7.30 (m, 2H), 7.27 – 7.22 (m, 3H), 4.67 – 4.60 (m, 1H), 3.13 – 3.08 (m, 1H), 2.90 – 2.85 (m, 1H), 2.10 – 2.06 (m, 1H), 1.85 – 1.79 (m, 1H), 1.23 (d,  $J$  = 4.1 Hz, 6H).  $^{13}C$  NMR (100 MHz,  $CDCl_3$ )  $\delta$  (ppm) 181.9, 136.4, 129.6, 128.8, 127.1, 77.5, 43.2, 41.9, 40.6, 25.2, 24.6. MS-ESI:  $m/z$  227.1 ( $[M+Na]^+$ ).

*4,5-Diphenyldihydrofuran-2(3H)-one (3x)* (CAS no: 20453-83-2).

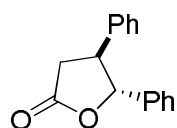

White solid. 17 mg, 24% yield.  $^1H$  NMR (400 MHz,  $CDCl_3$ )  $\delta$  (ppm) 7.38 – 7.29 (m, 6H), 7.23 – 7.18 (m, 4H), 5.43 (d,  $J$  = 8.5 Hz, 1H), 3.64 – 3.57 (m, 1H), 3.10 – 3.04 (m, 1H), 2.96 – 2.89 (m, 1H).  $^{13}C$  NMR (100 MHz,  $CDCl_3$ )  $\delta$  (ppm) 175.5, 138.2, 138.0, 129.3, 128.8, 128.1, 127.5, 125.8, 87.6, 50.7, 37.3. MS-ESI:  $m/z$  261.0 ( $[M+Na]^+$ ).

*4-(4-(tert-Butyl)phenyl)-5-phenyldihydrofuran-2(3H)-one (3y)*

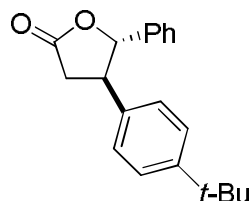

Yellow solid. 28 mg, 30% yield.  $^1H$  NMR (400 MHz,  $CDCl_3$ )  $\delta$  (ppm) 7.37 – 7.34 (m, 4H), 7.30 (d,  $J$  = 7.0 Hz, 1H), 7.20 (d,  $J$  = 7.4 Hz, 2H), 7.14 (d,  $J$  = 8.3 Hz, 2H), 5.44 (d,  $J$  = 8.3 Hz, 1H), 3.64 – 3.57 (m, 1H), 3.10 – 3.04 (m, 1H), 2.96 – 2.89 (m, 1H), 1.30 (s, 9H).  $^{13}C$  NMR (100 MHz,  $CDCl_3$ )  $\delta$  (ppm) 175.6, 151.9, 138.6, 134.9, 129.3, 128.0, 127.5, 125.8, 125.6, 87.5, 50.3, 37.5, 34.8, 31.5. HRMS-ESI:  $m/z$  317.1516 ( $[M+Na]^+$ ,  $C_{20}H_{22}NaO_2^+$  calcd. 317.1517).

# $^1\text{H}$ NMR and $^{13}\text{C}$ NMR spectra

3a

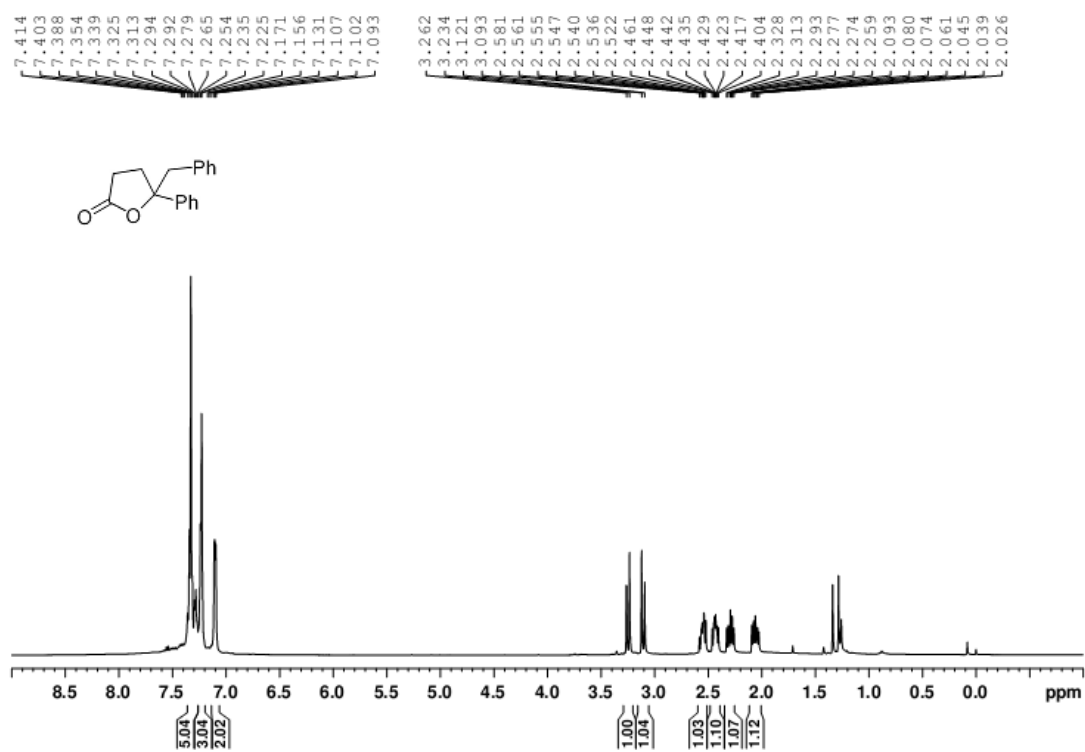

3a

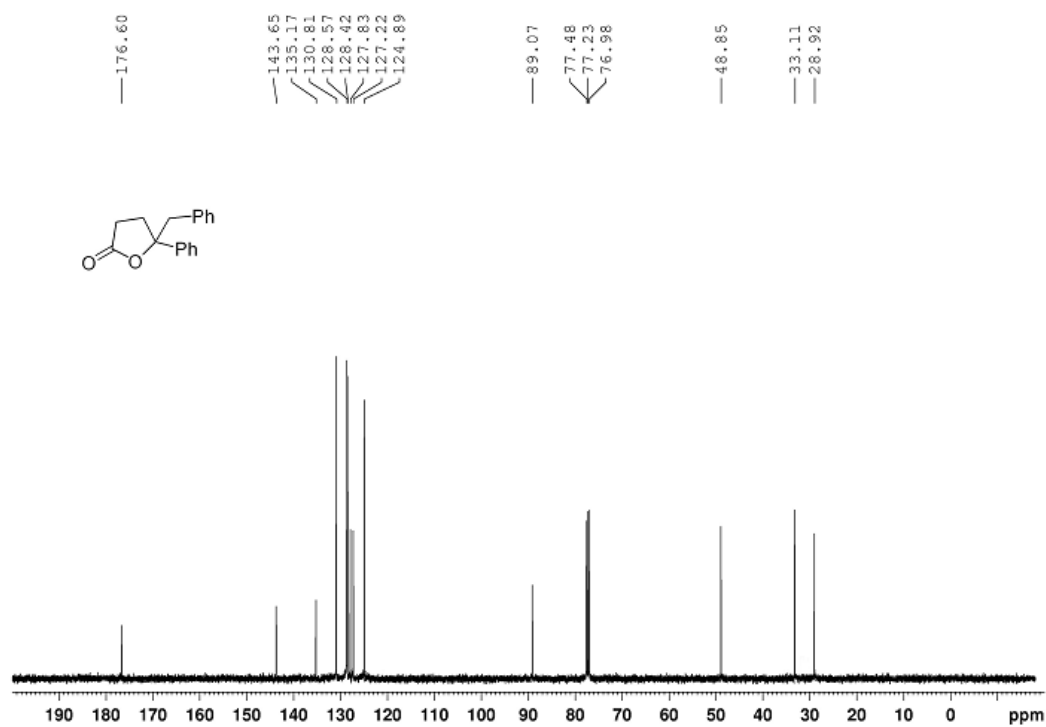

3b

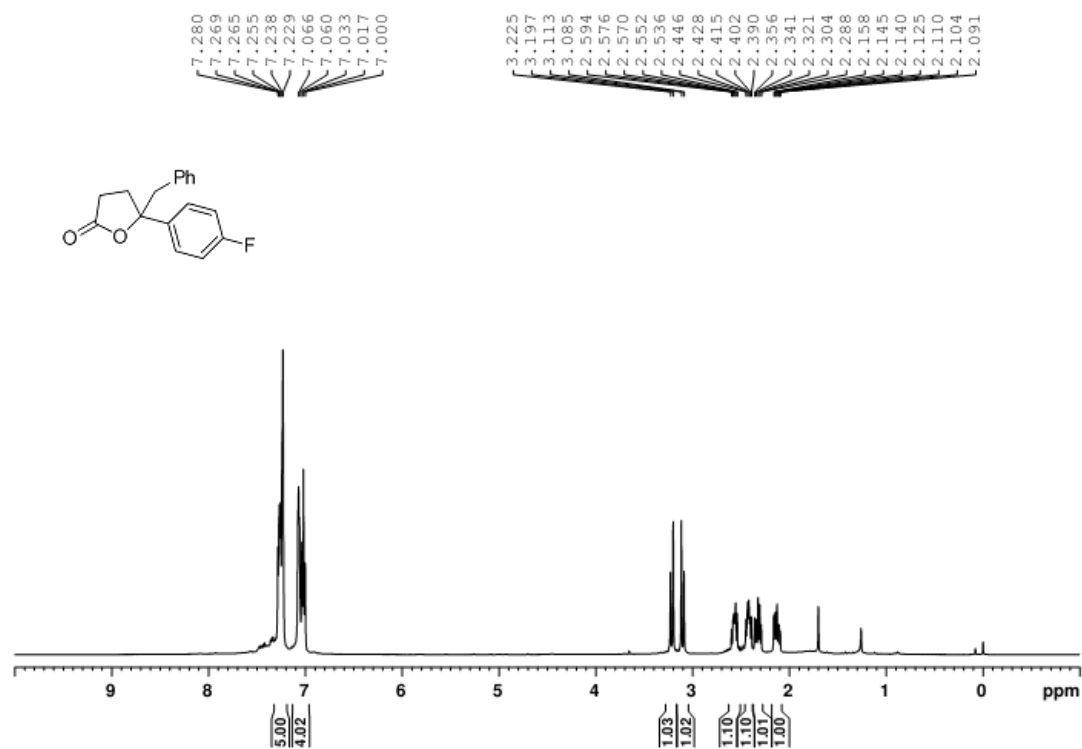

3b

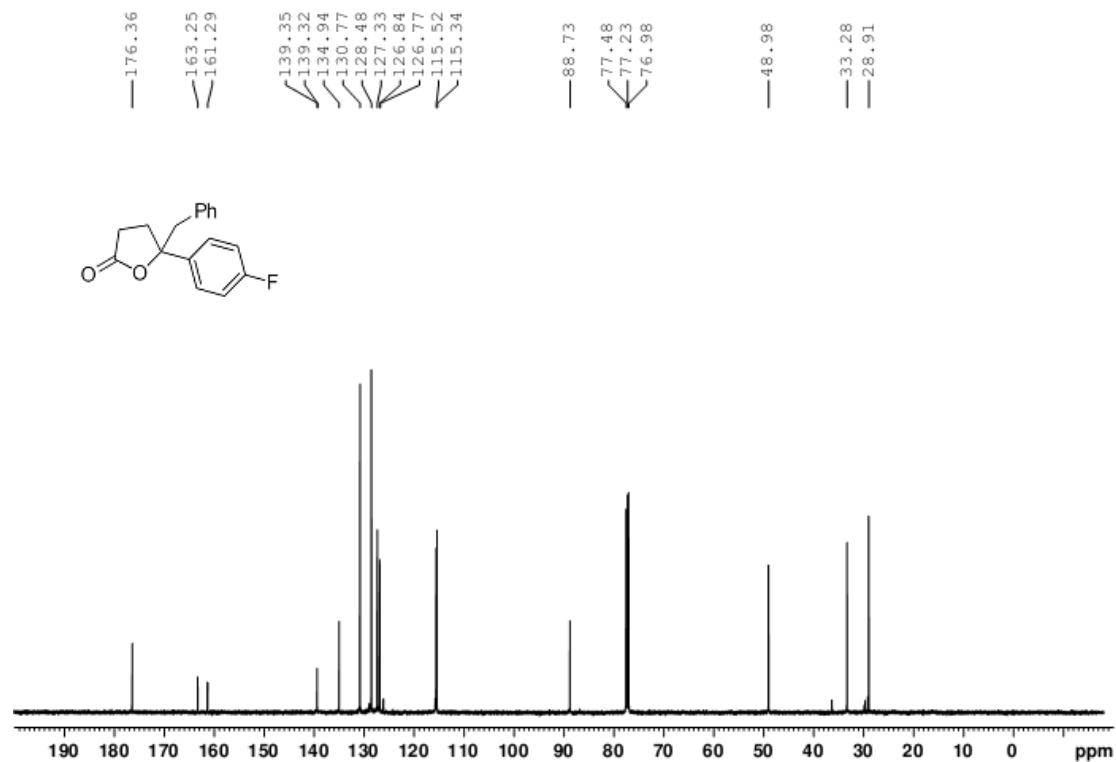

3c

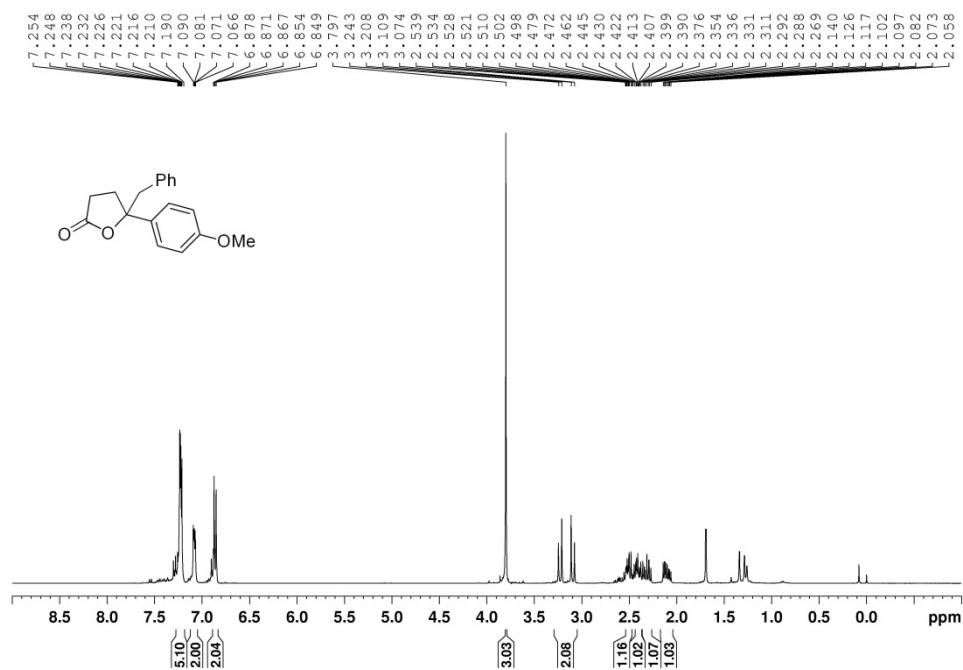

3c

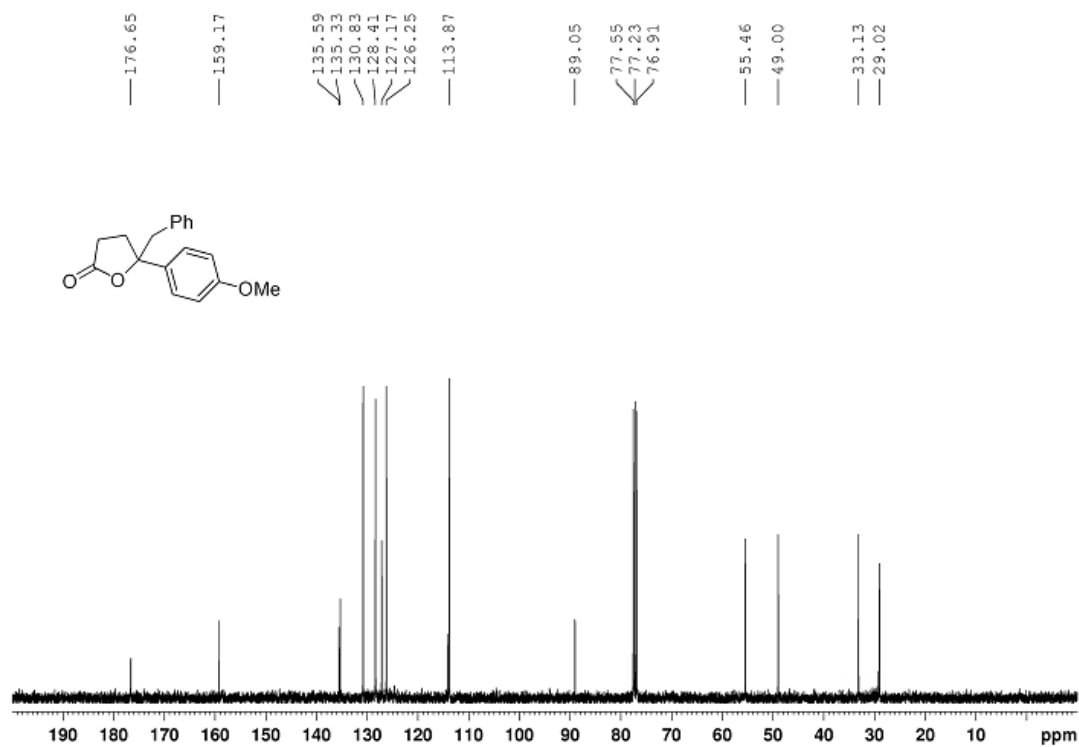

3d

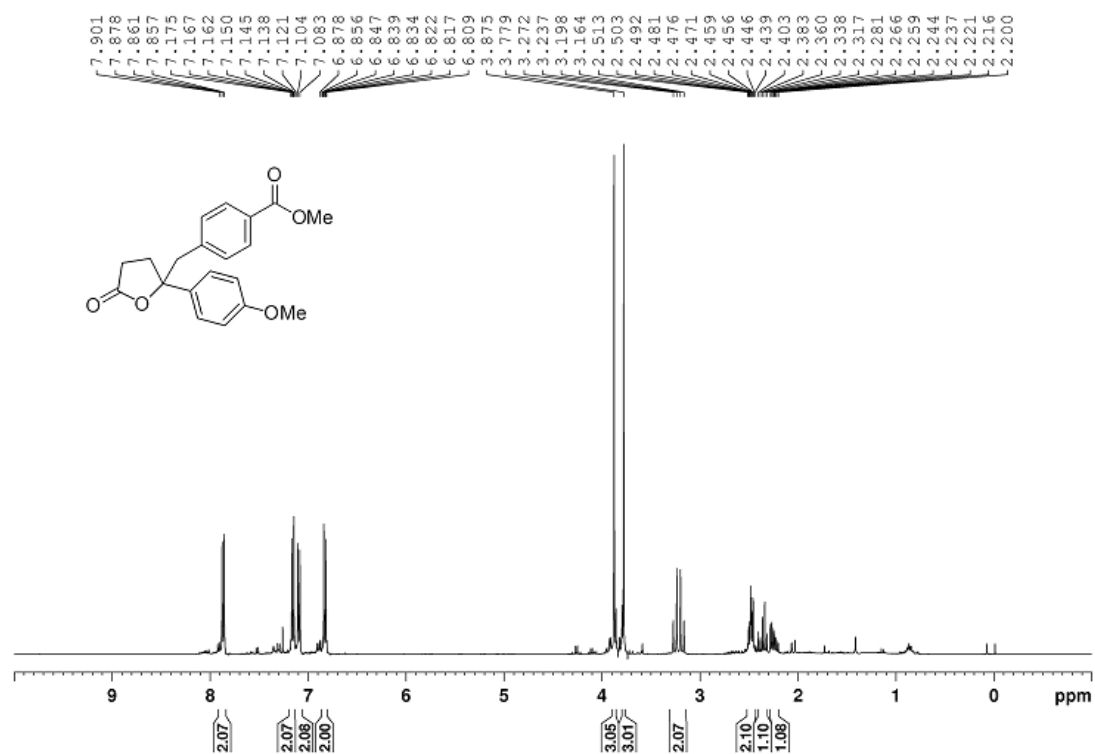

3d

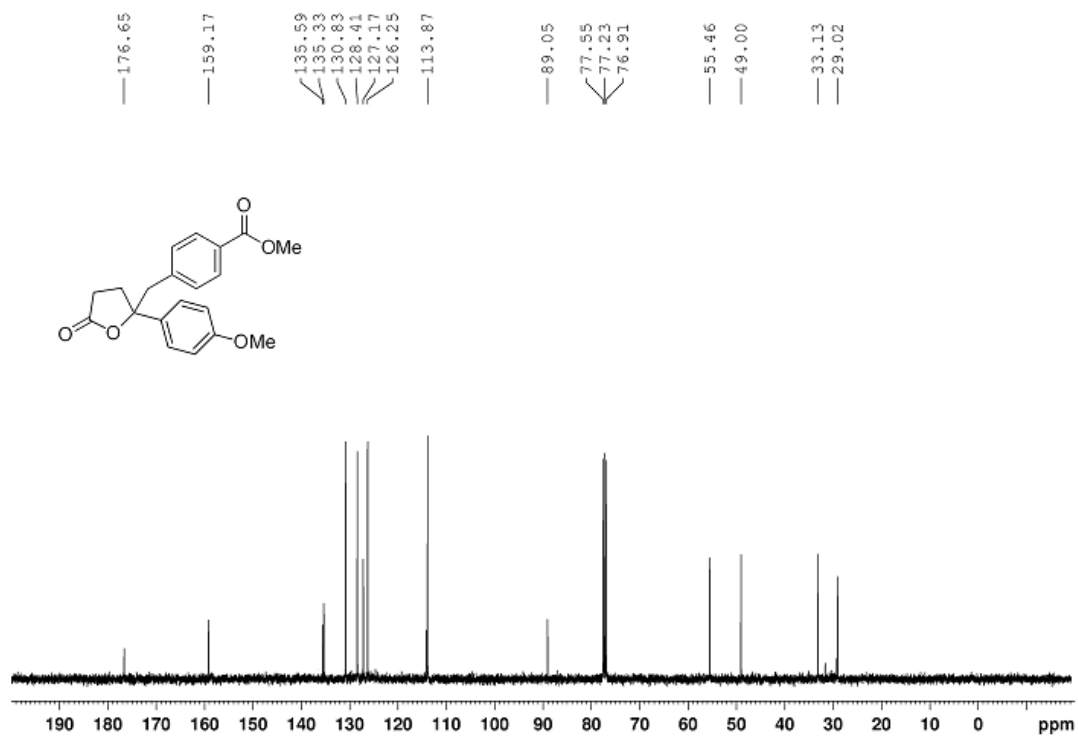

3e

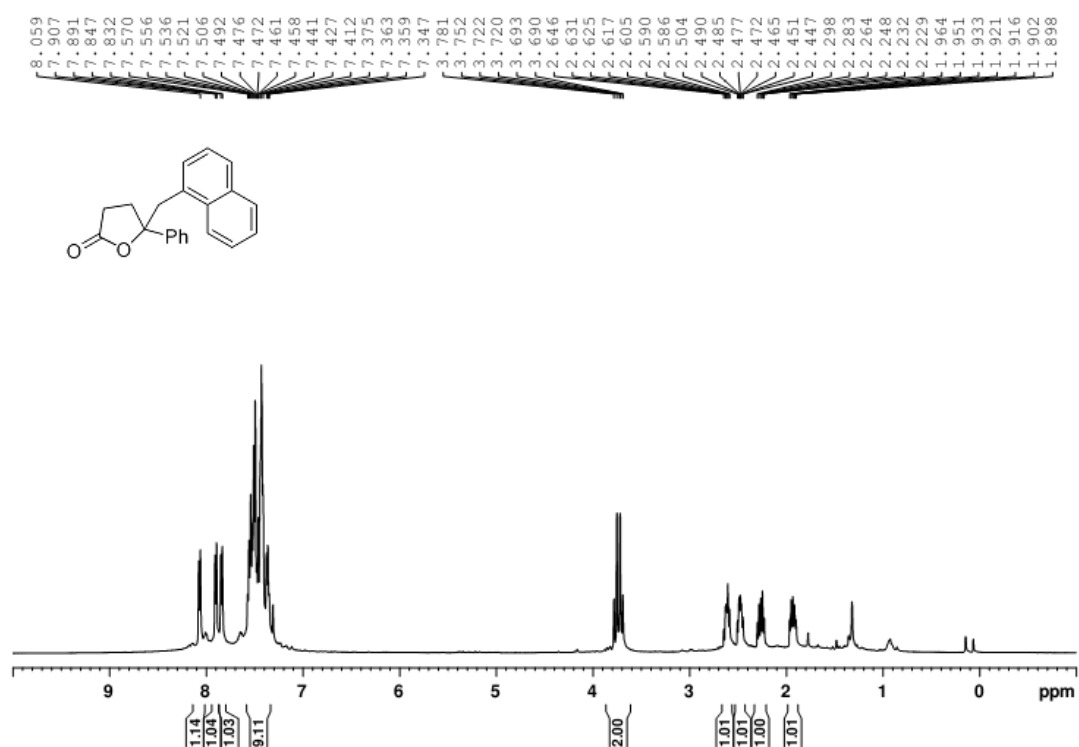

3e

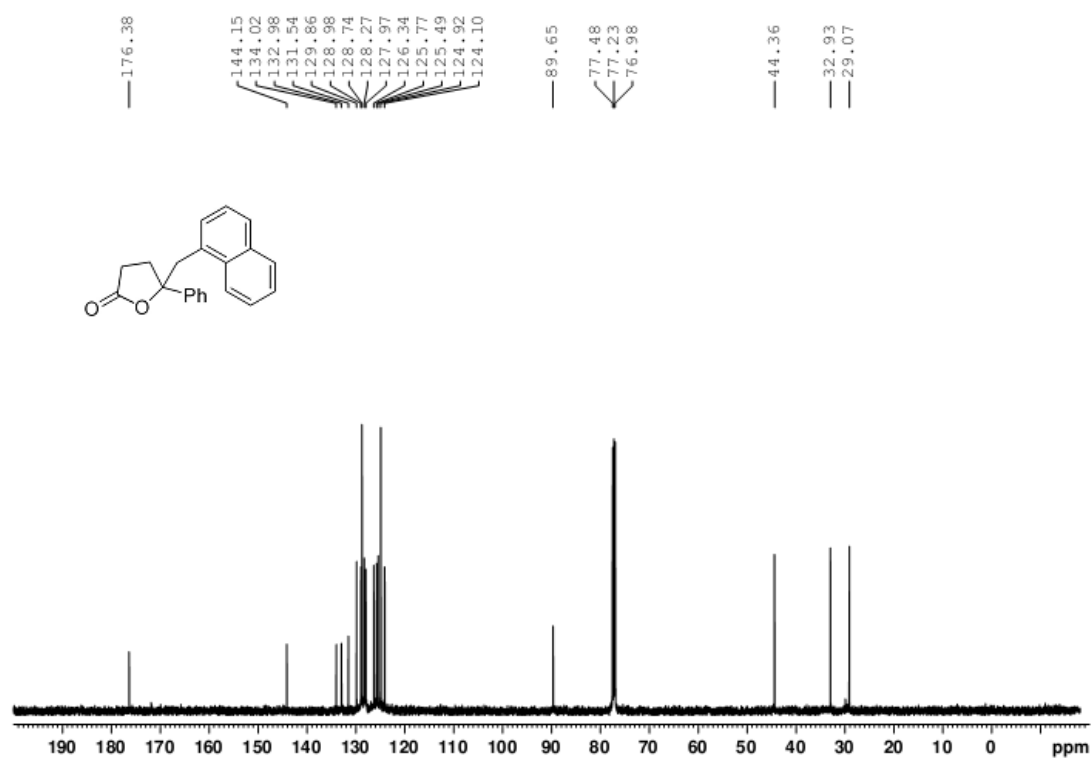



3f

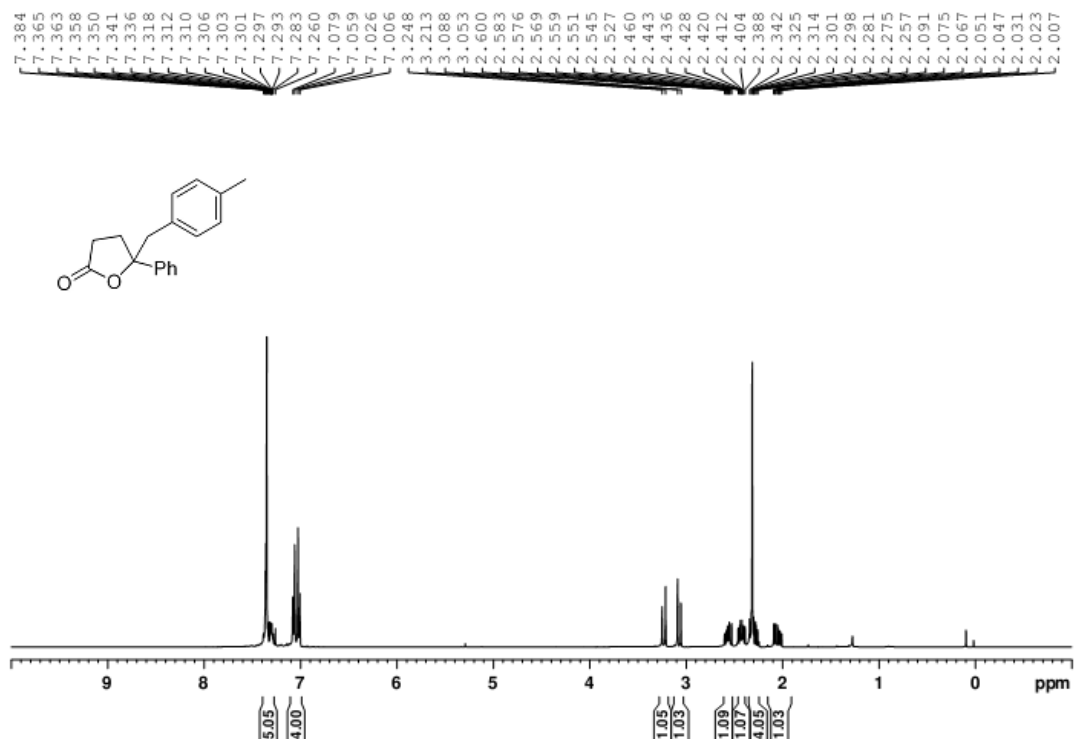

3f

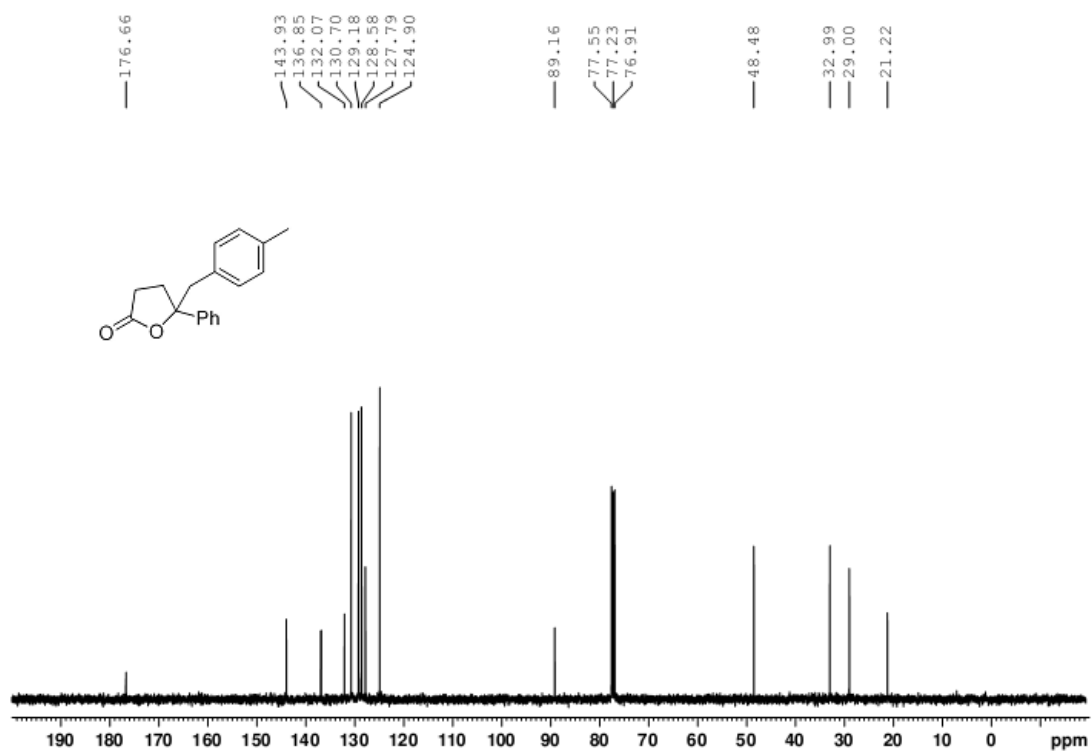

3g

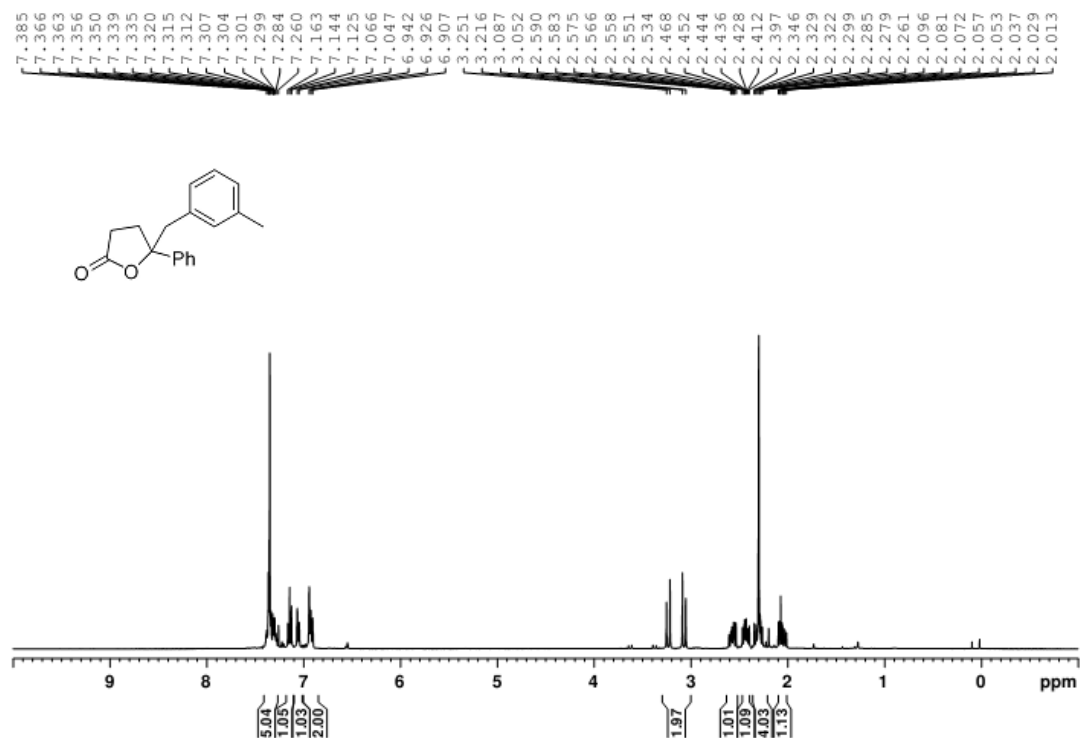

3g

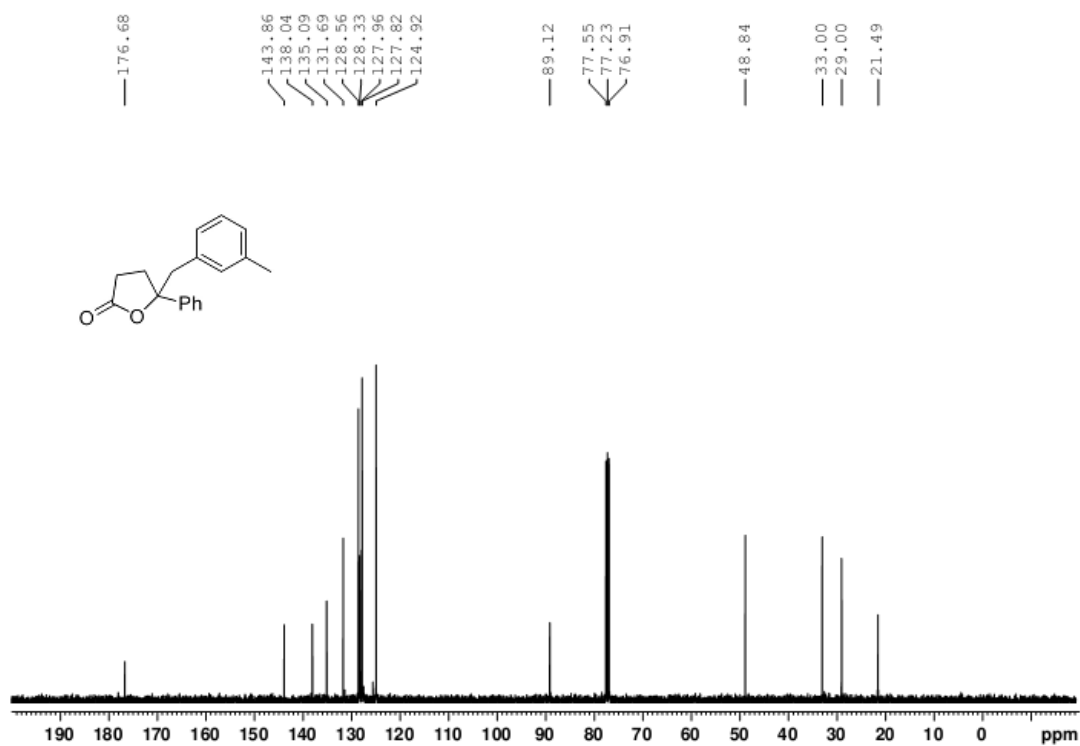

3h

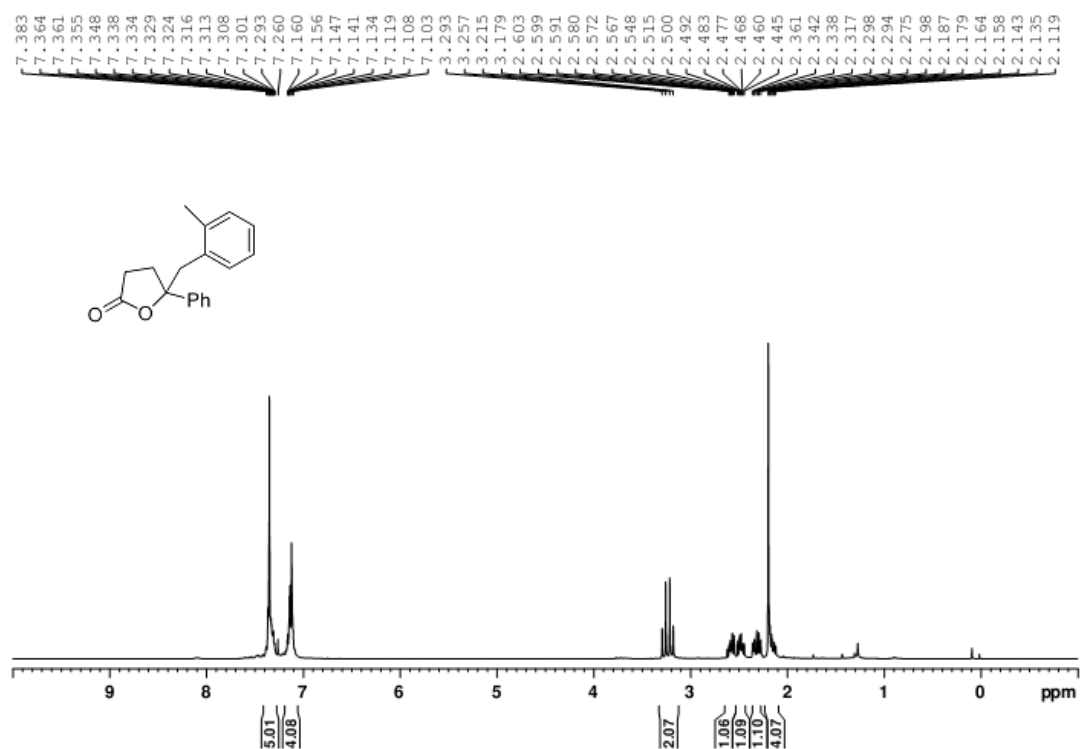

3h

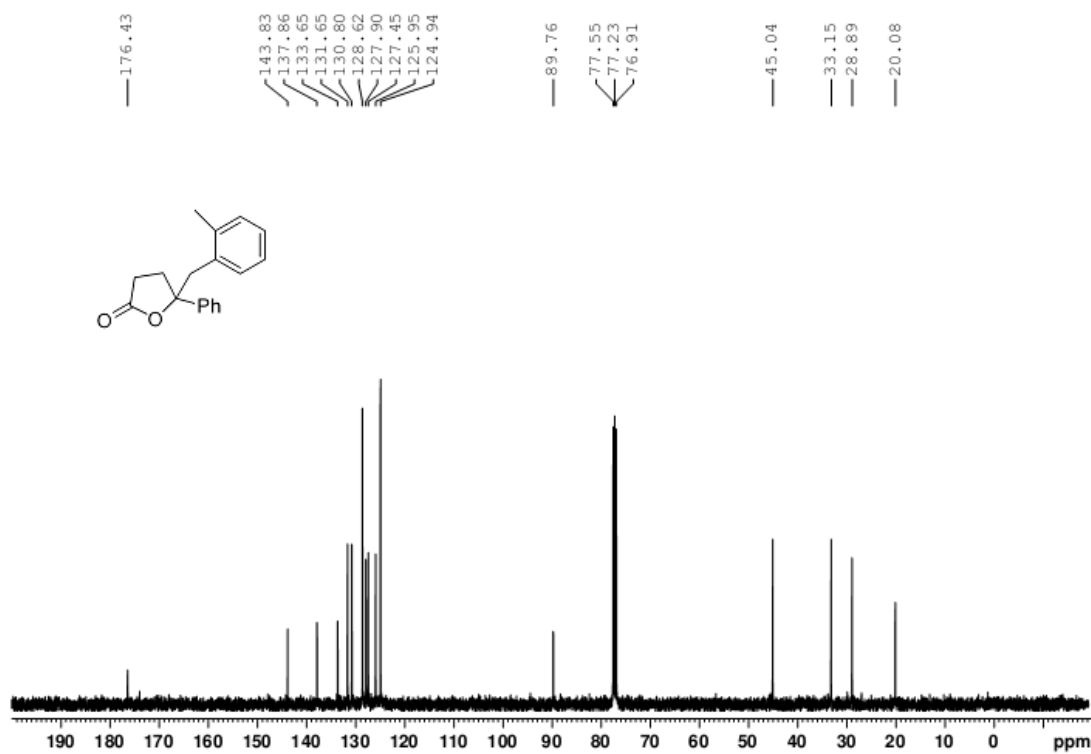

3i

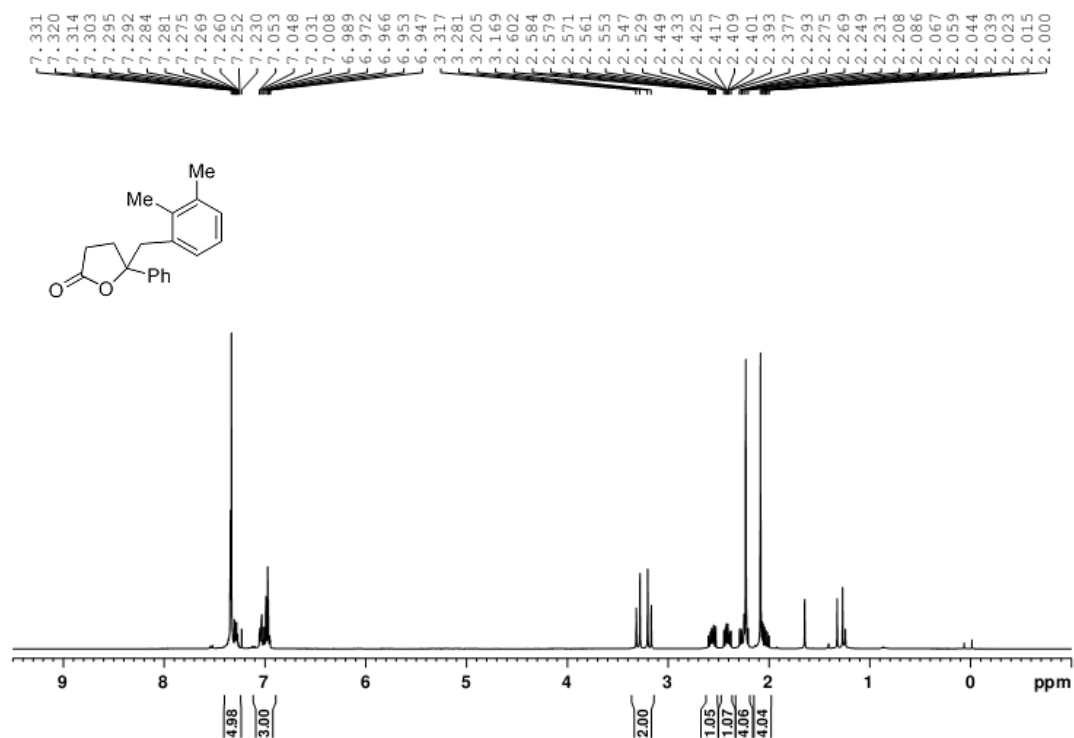

3i

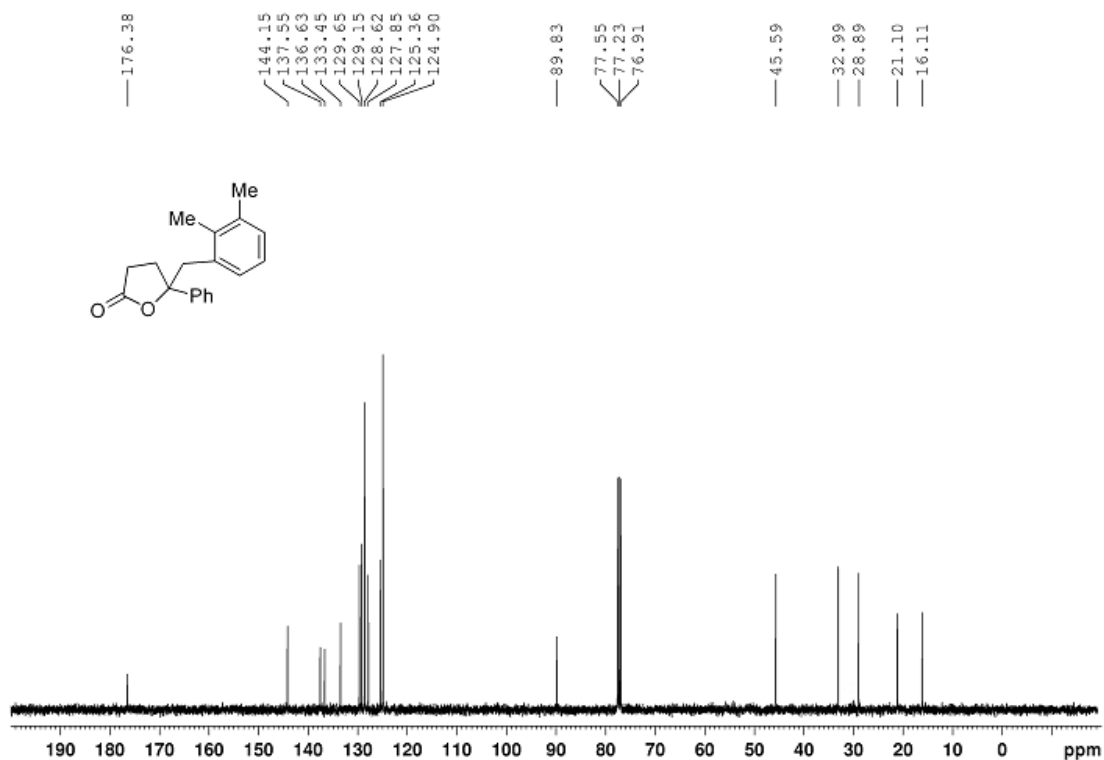

3j

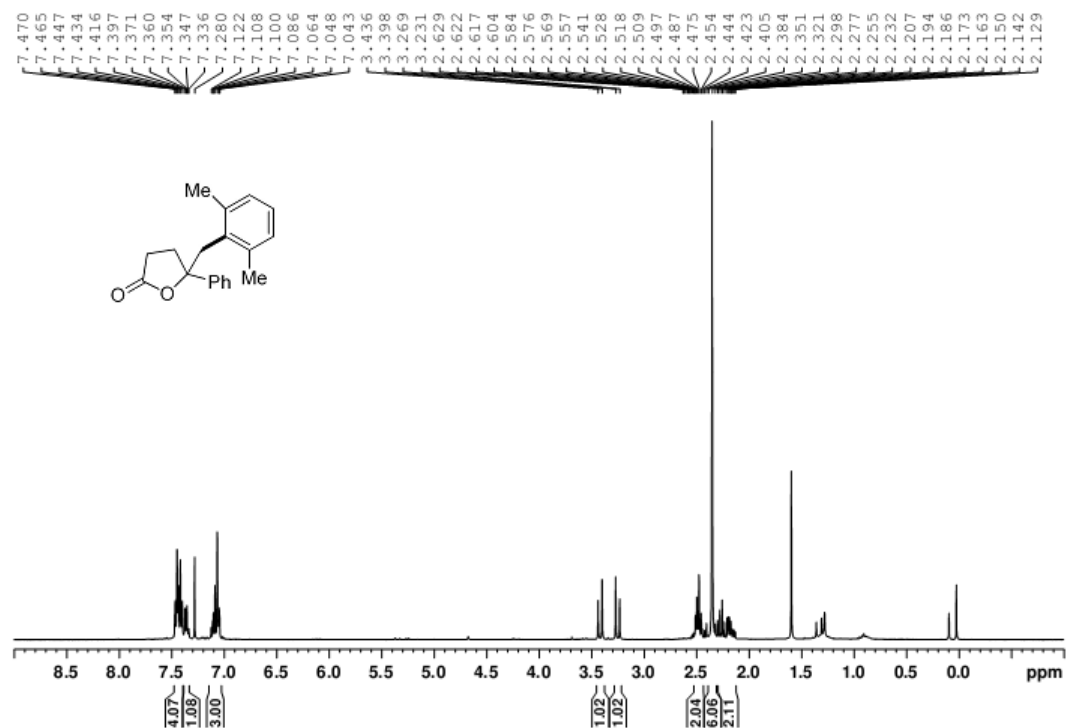

3j

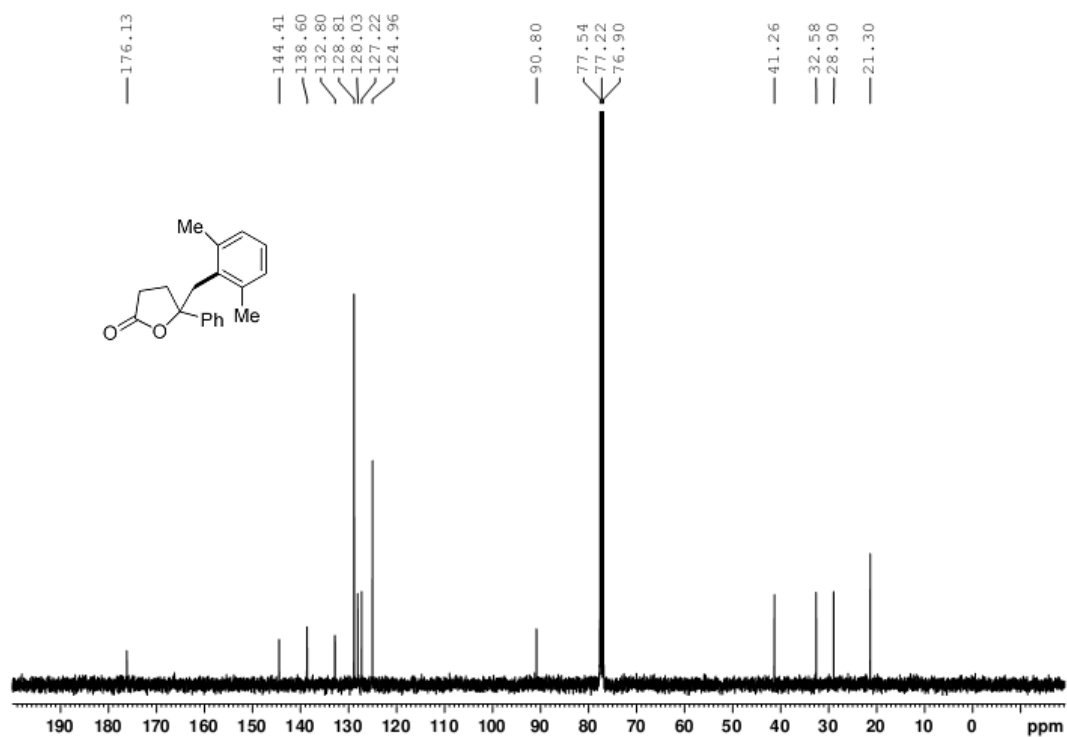

3k

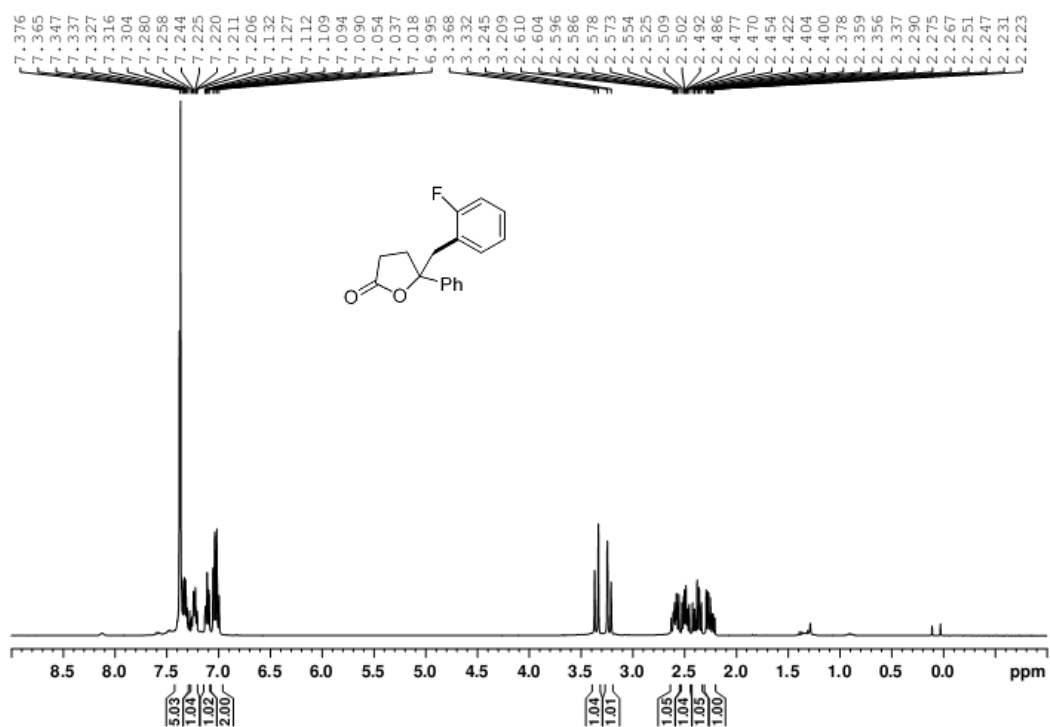

3k

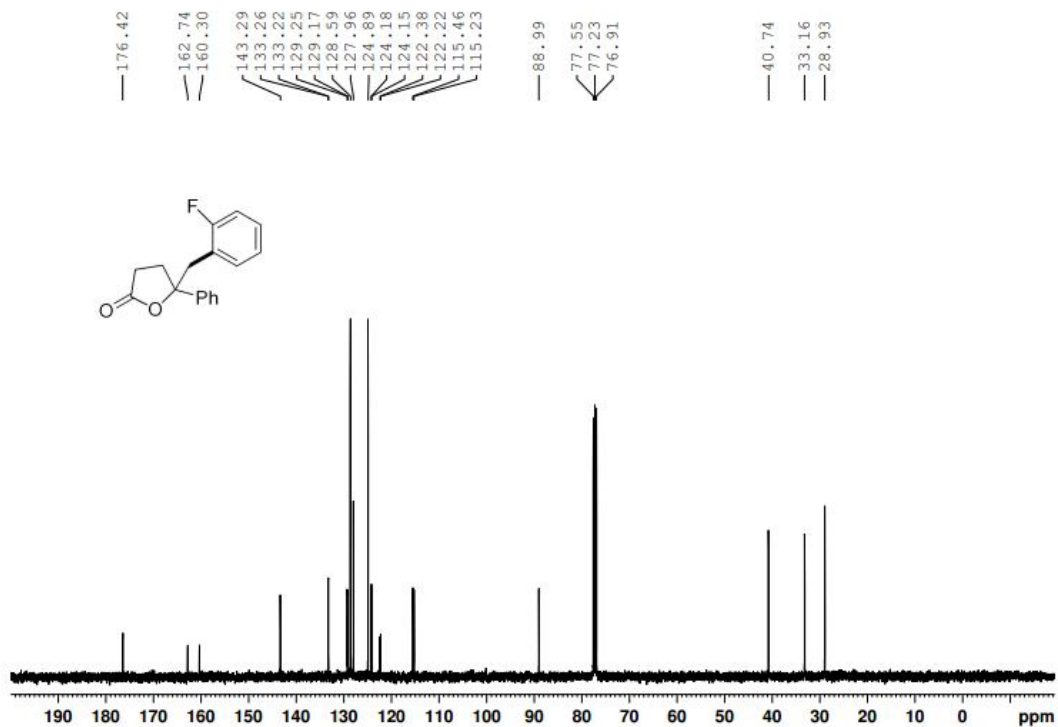

31

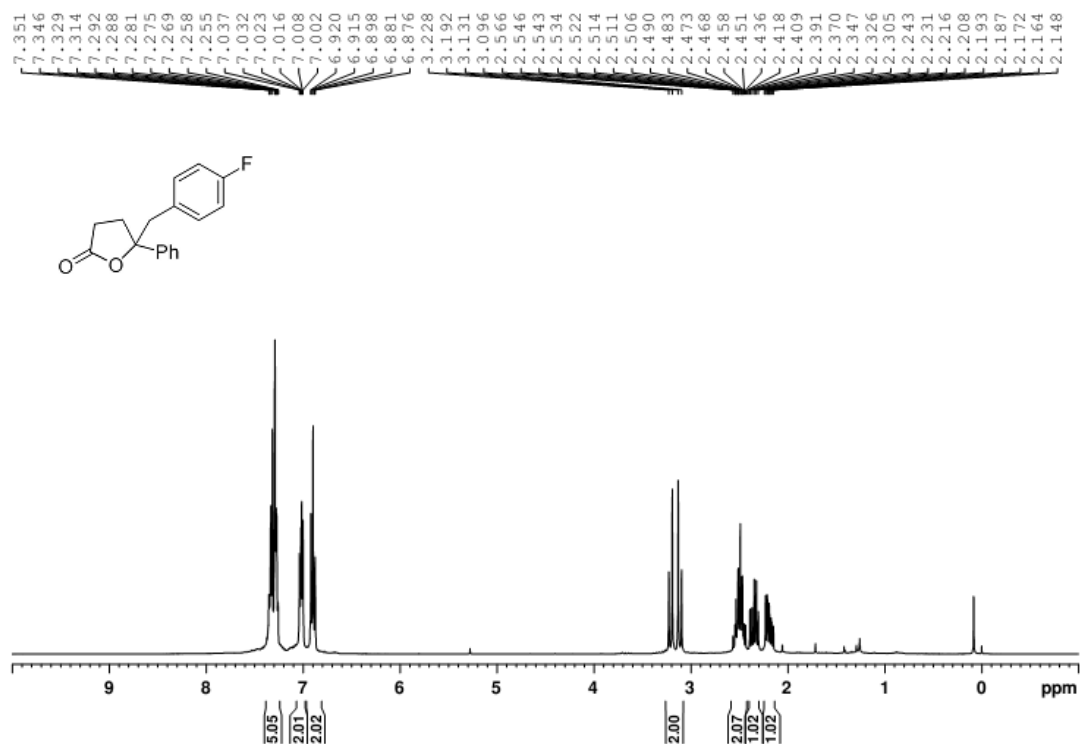

31

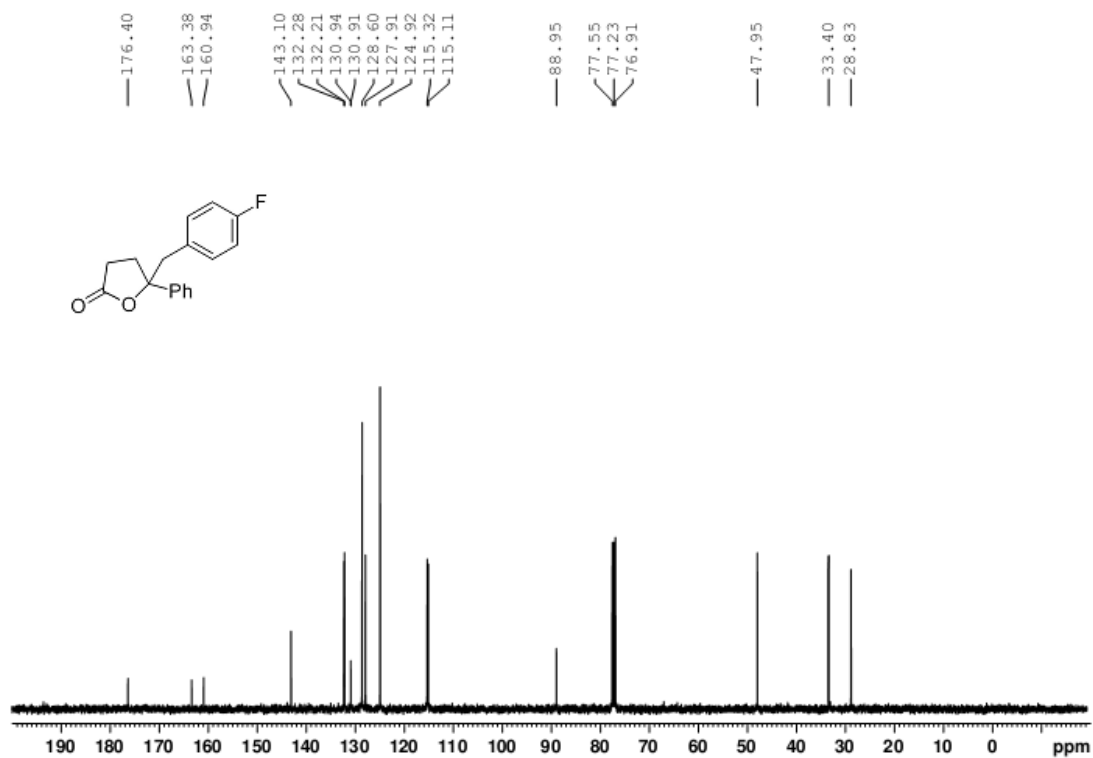

3m

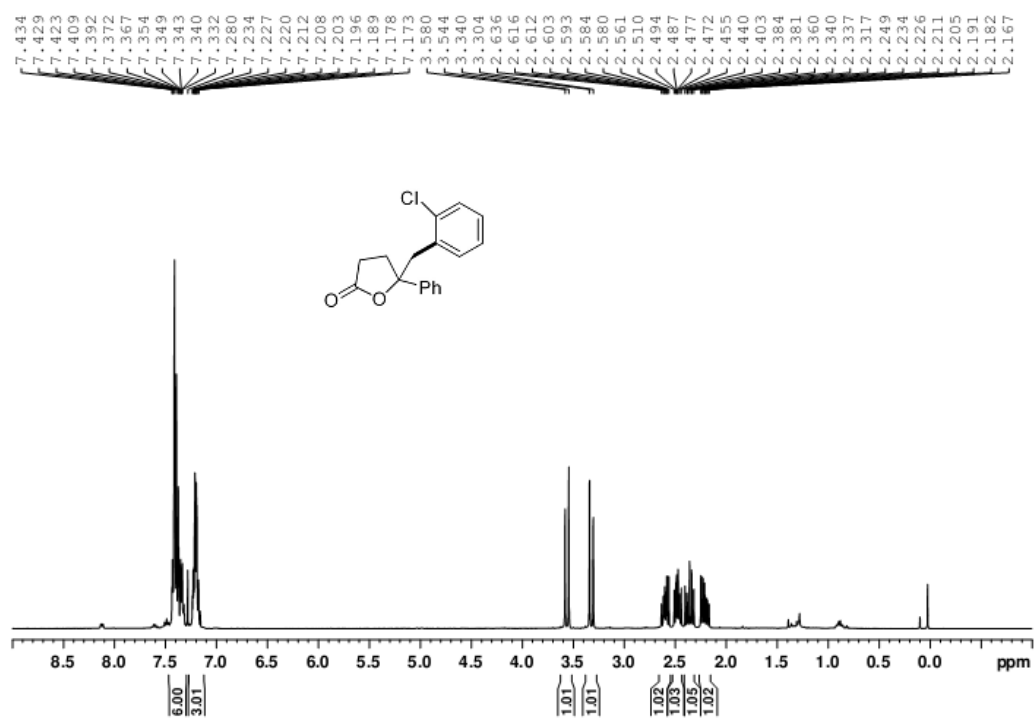

3m

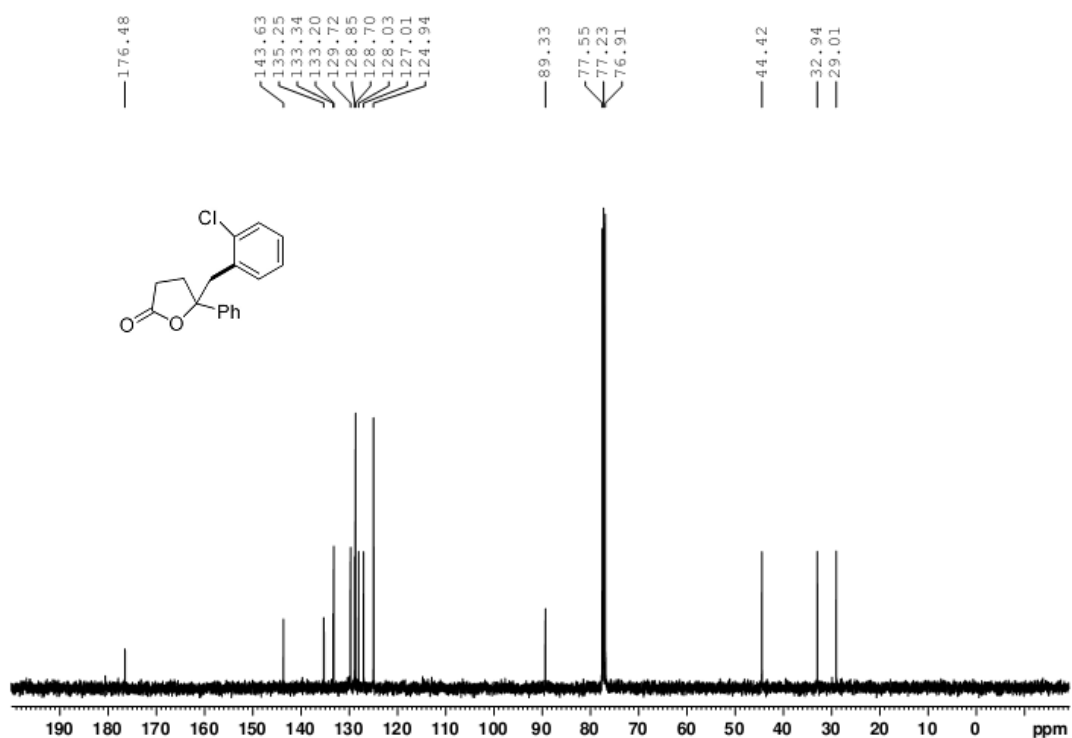



3n

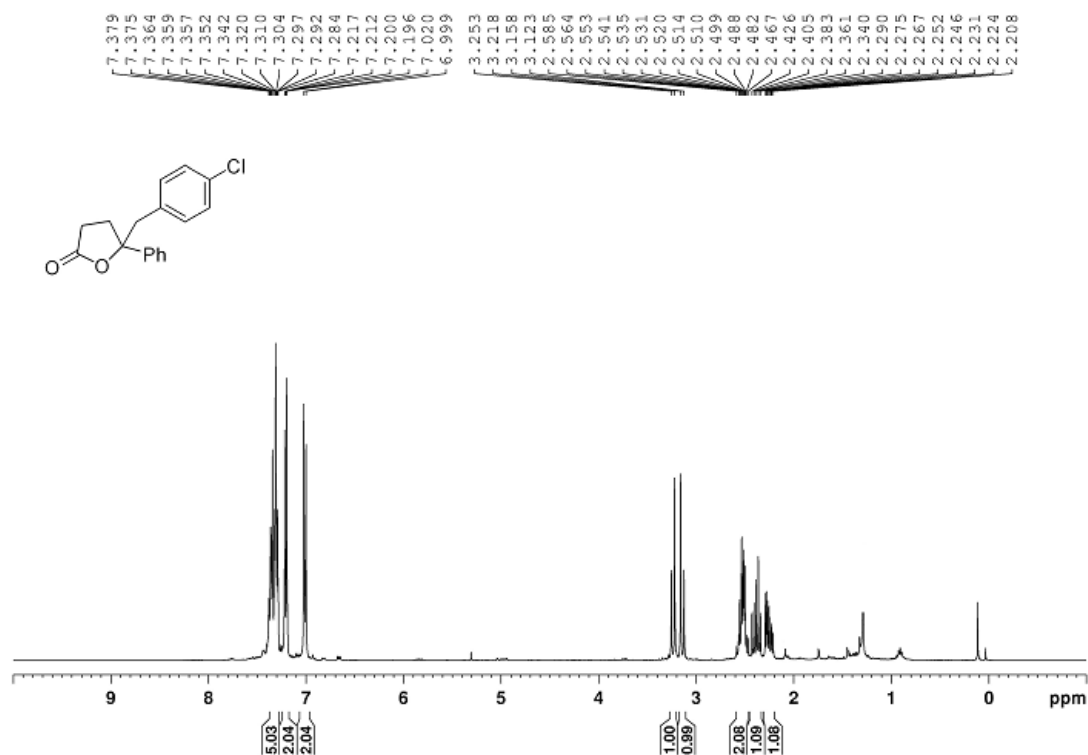

3n

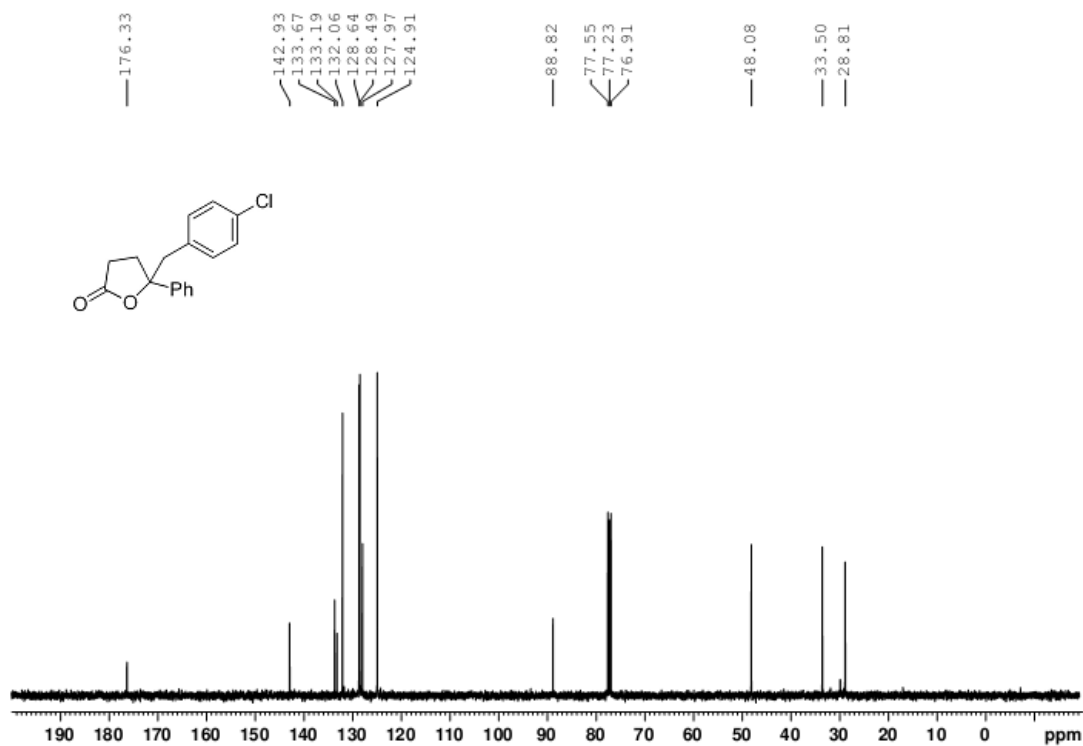

3o

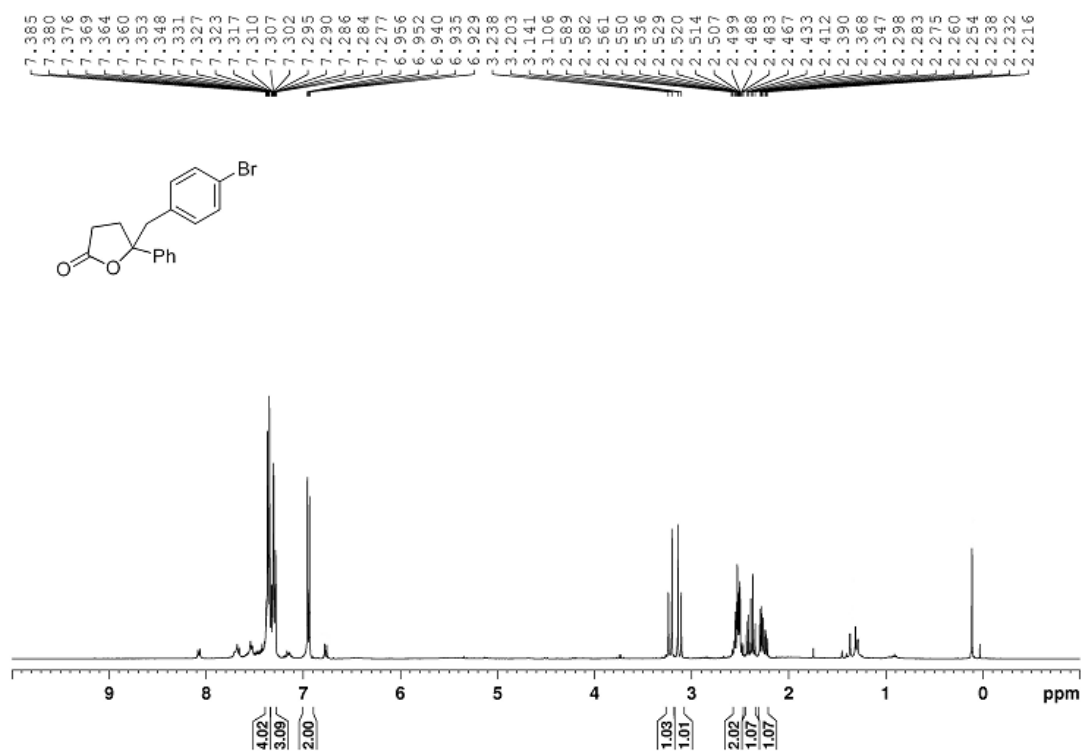

3o

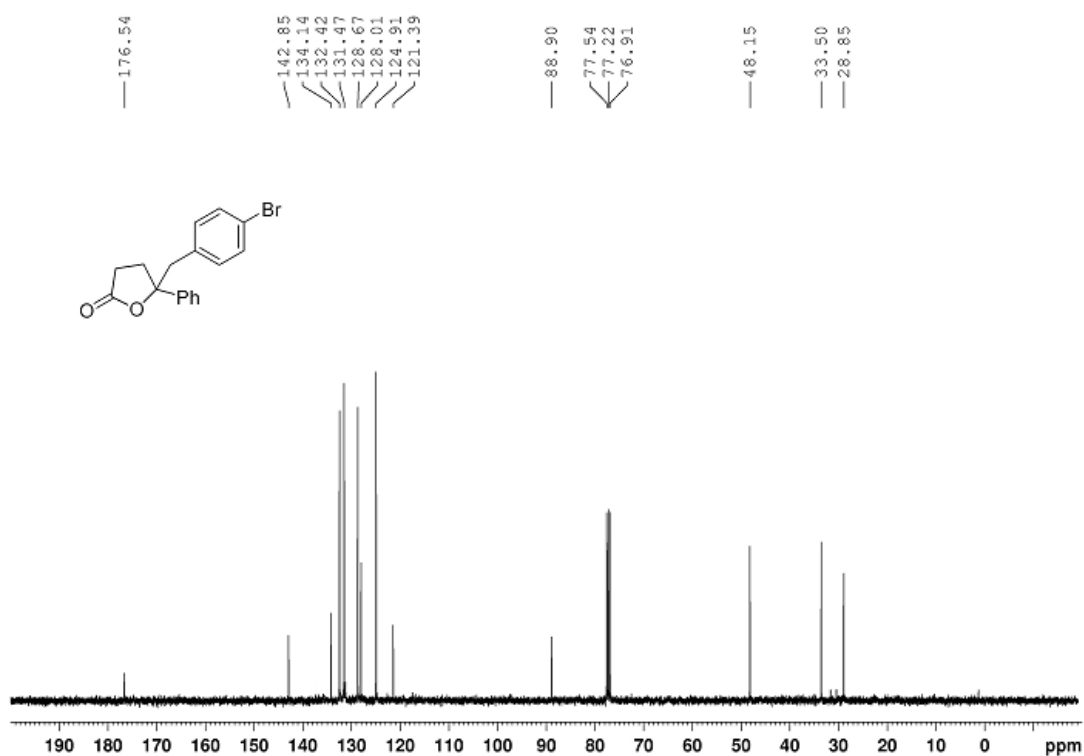

3p

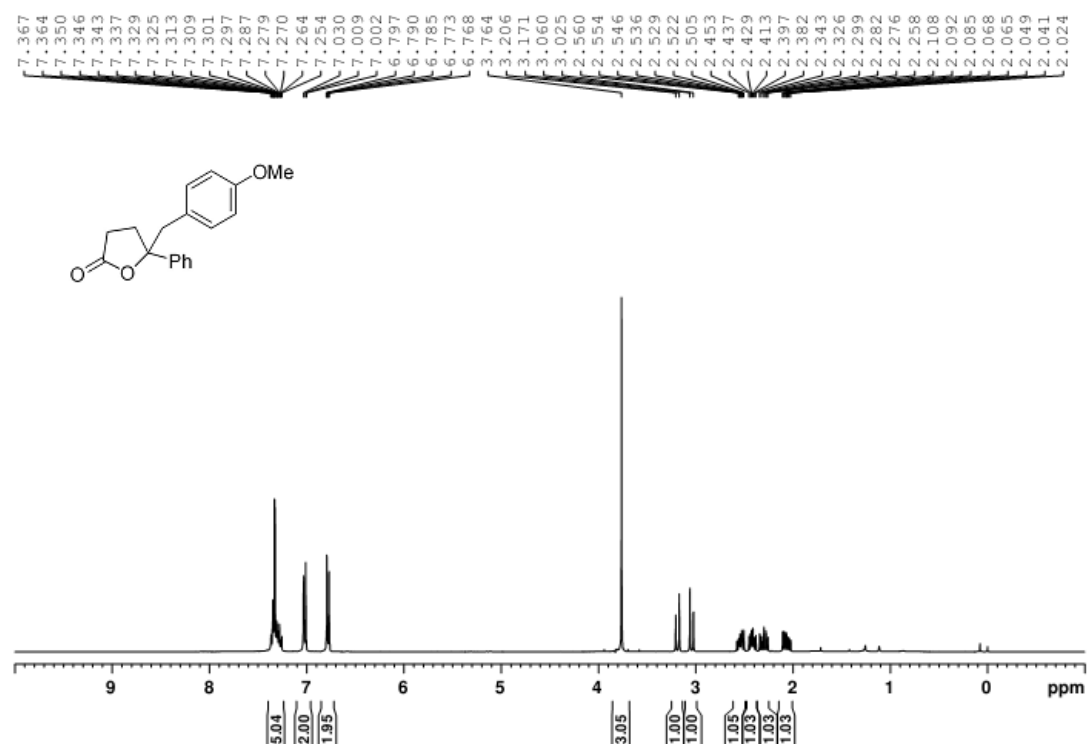

3p

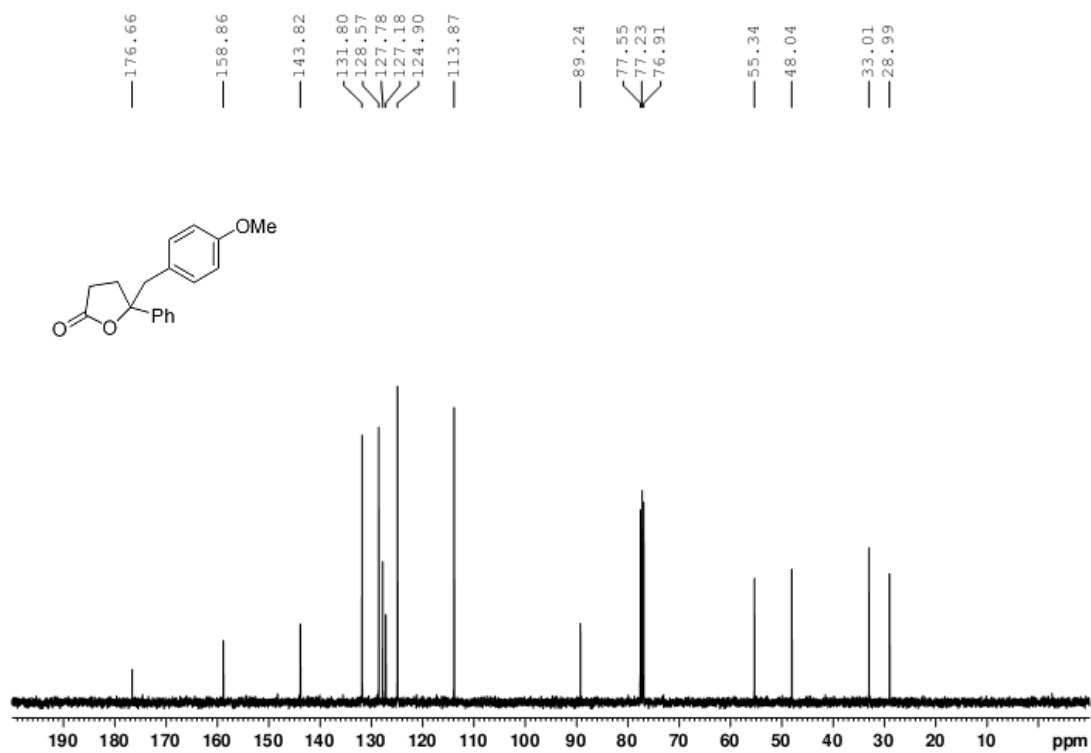

3q

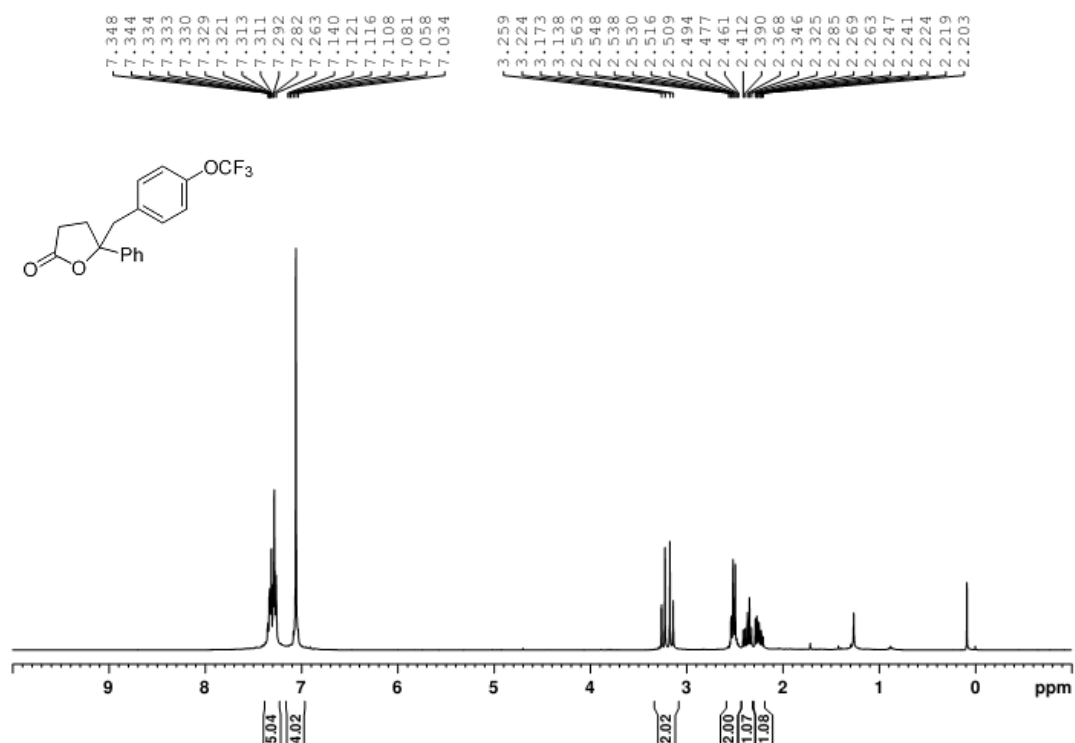

3q

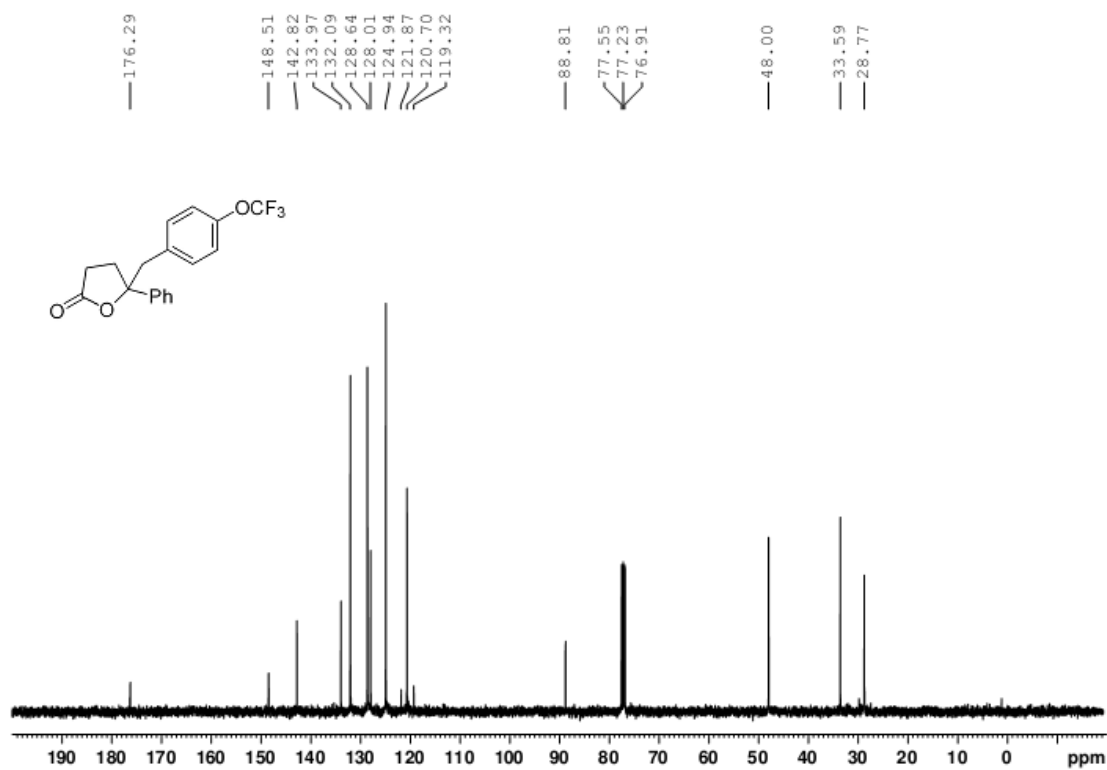

3r

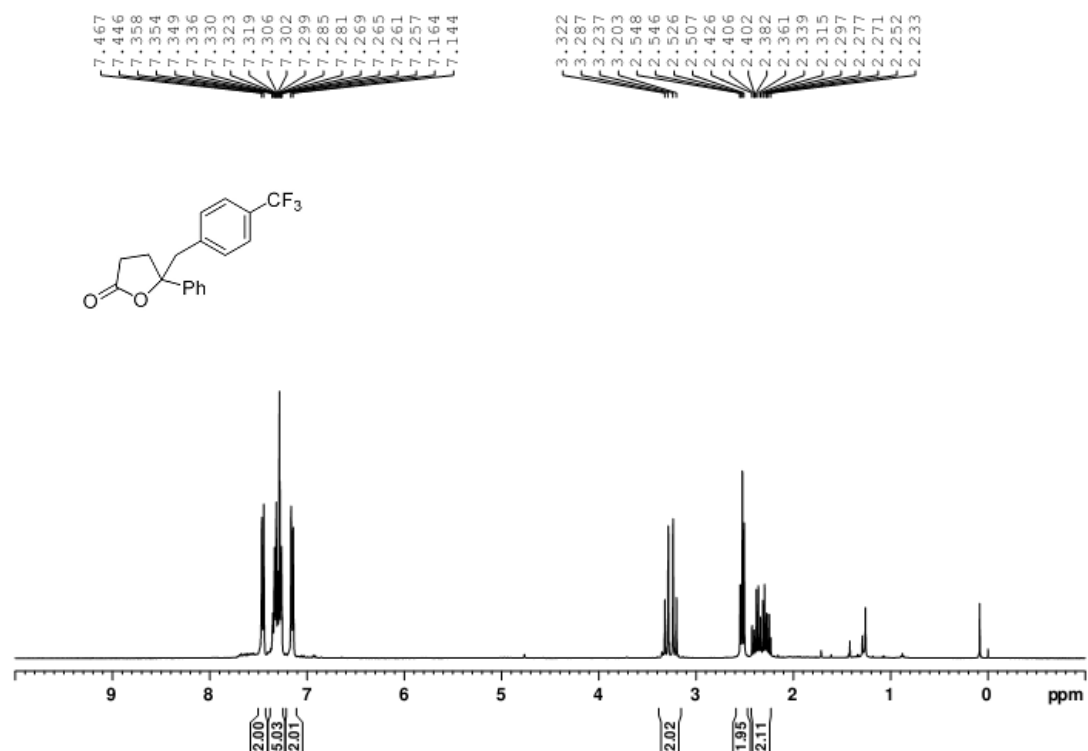

3r

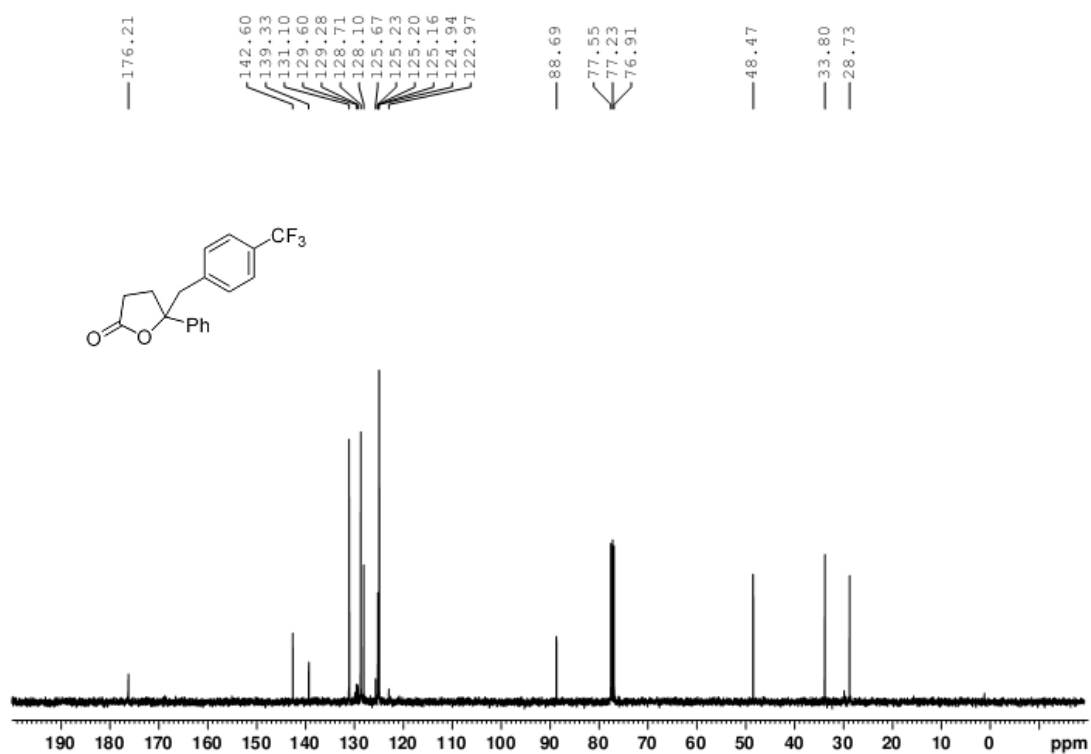

3s

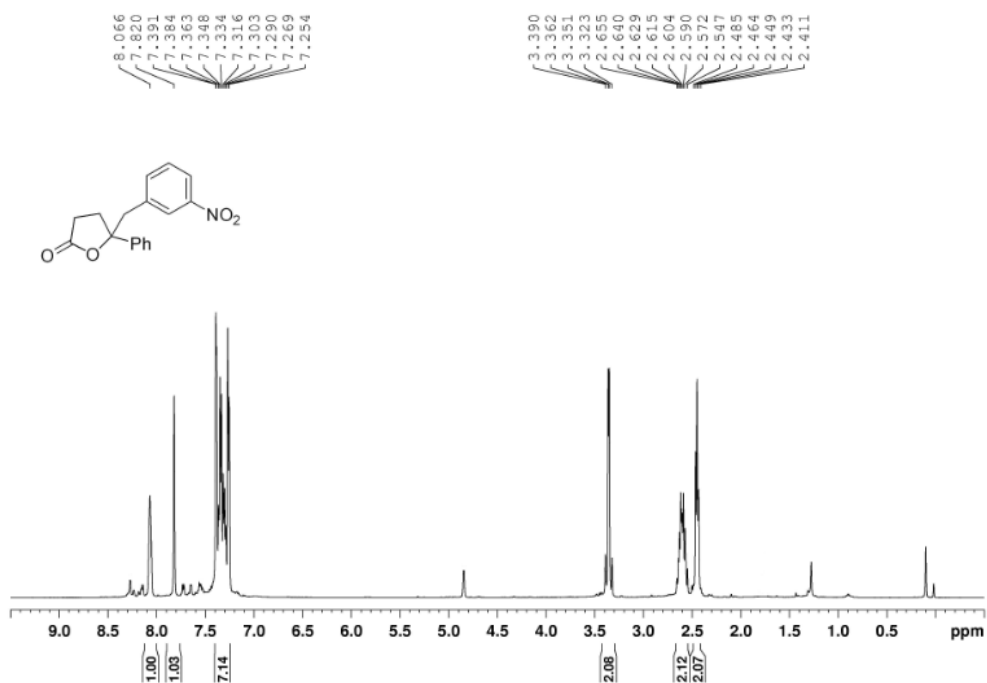

3s

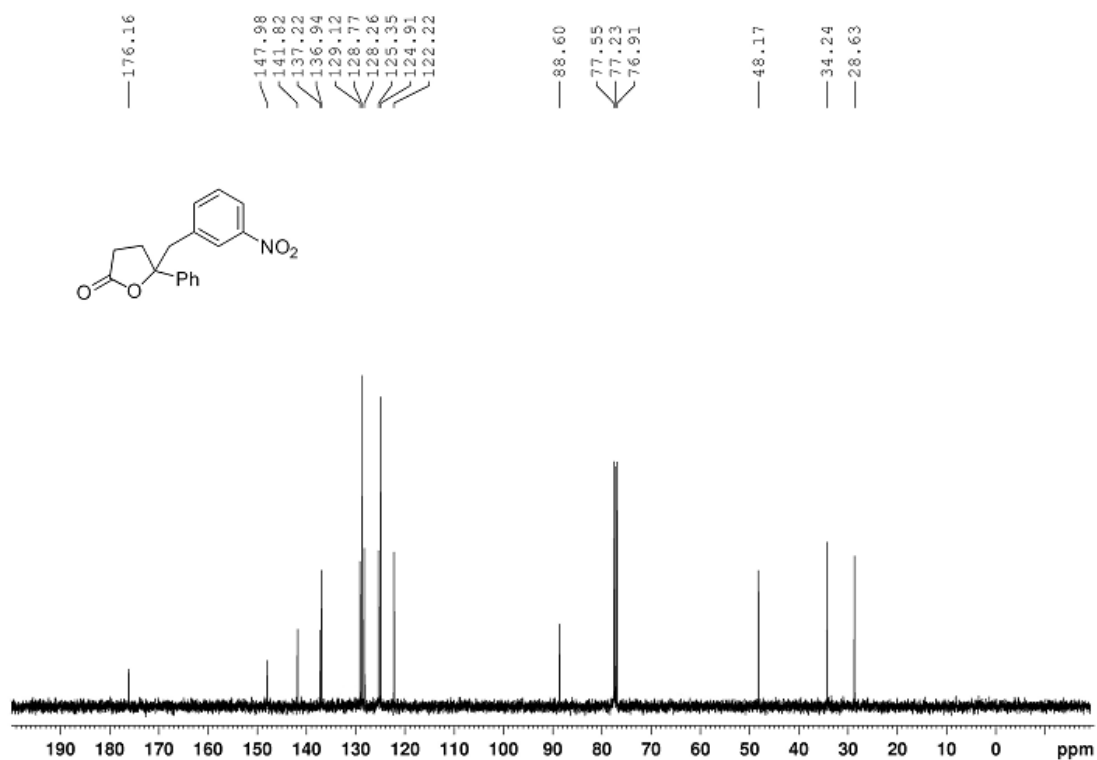

3t

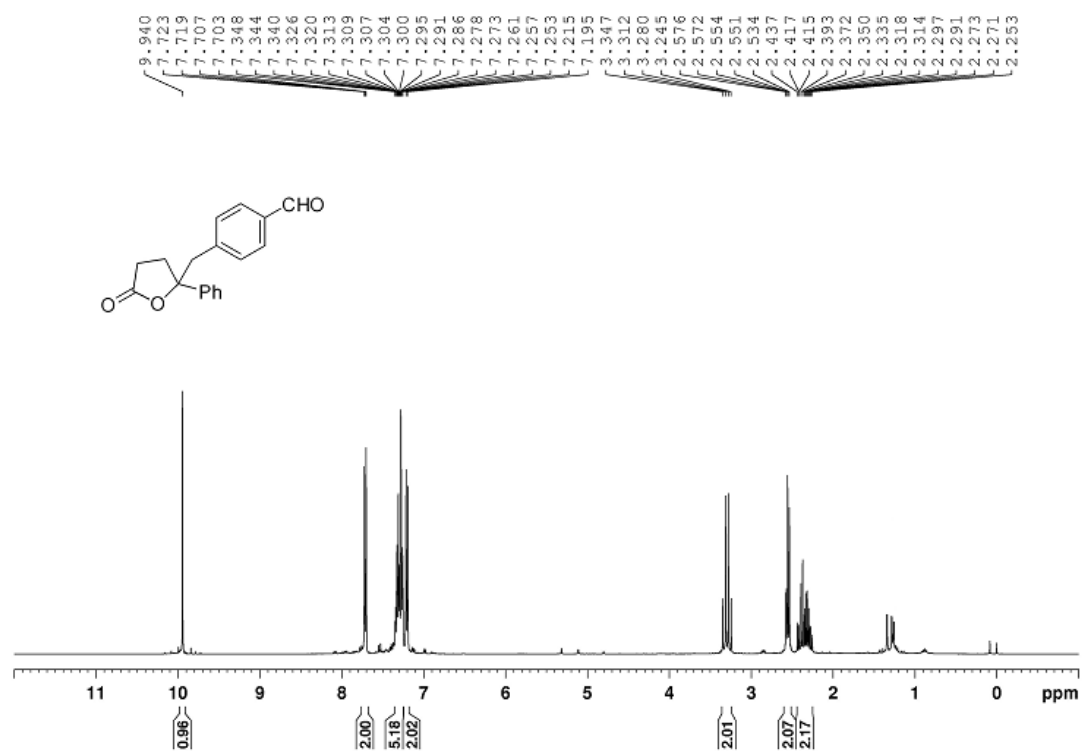

3t

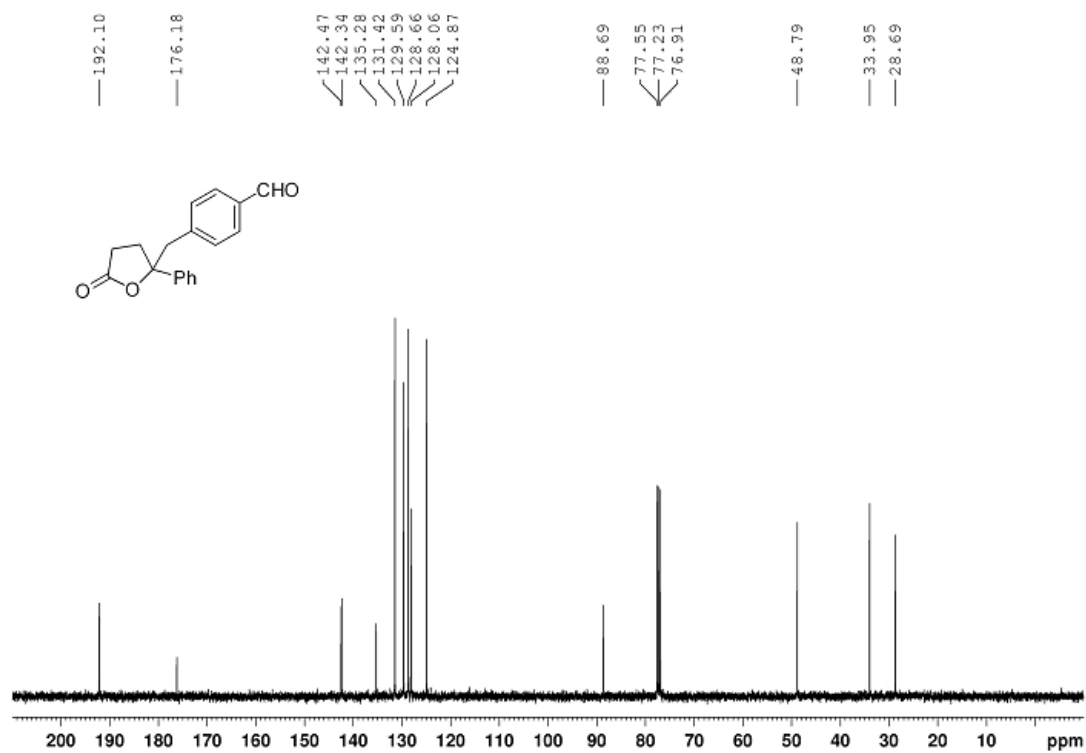

3u

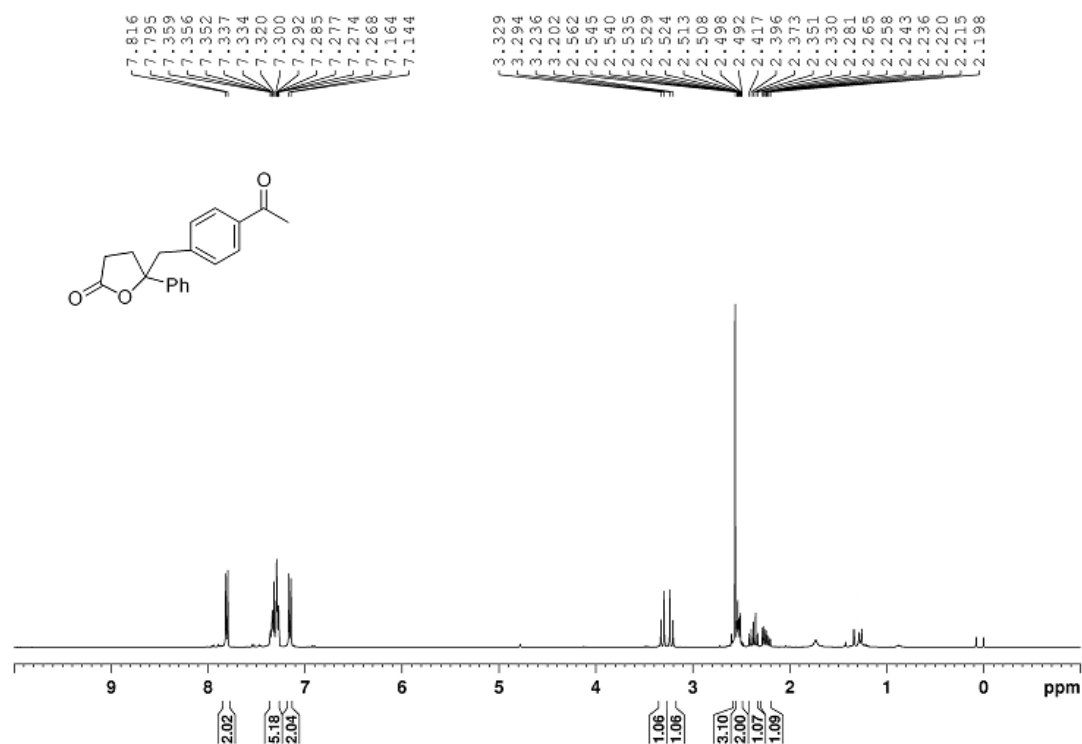

3u

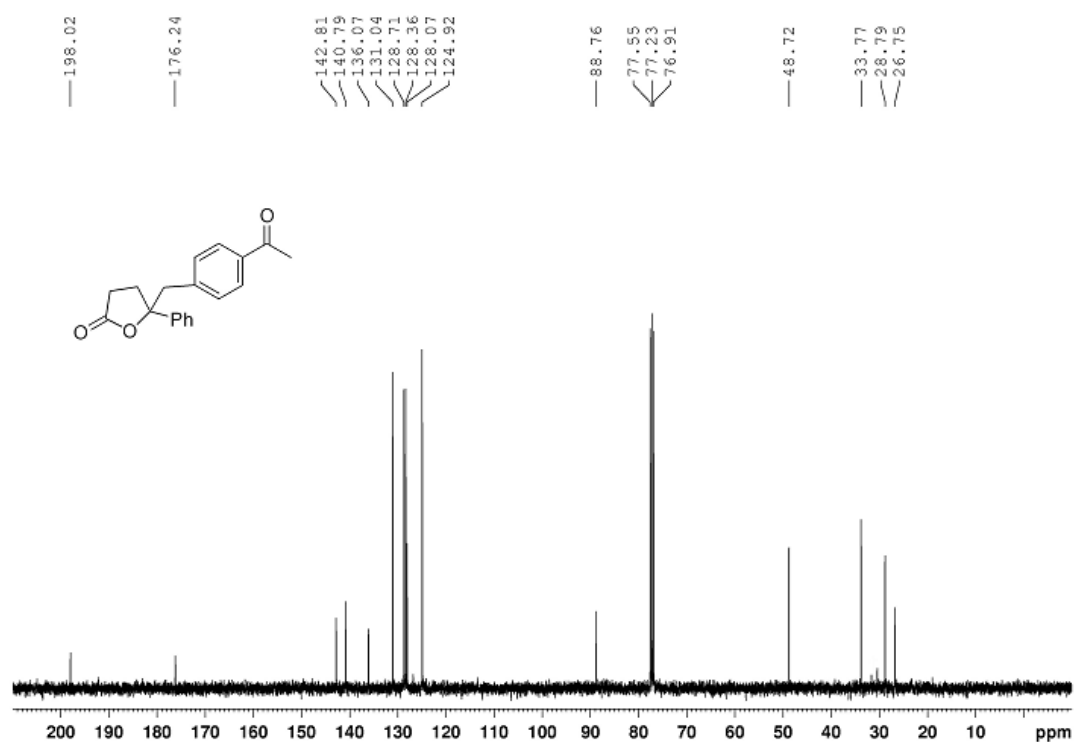



3v

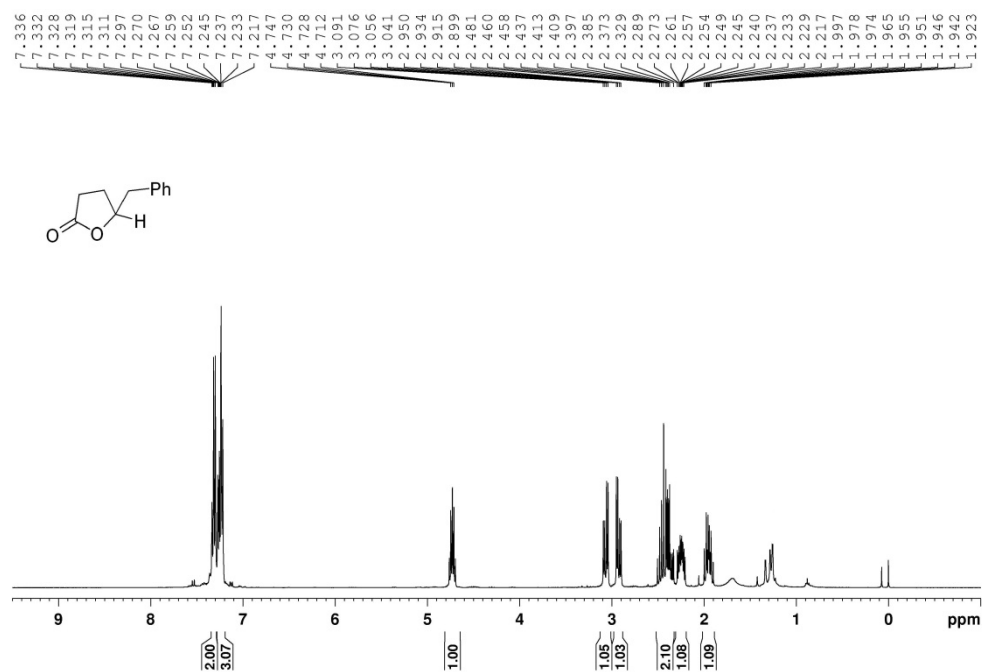

3v

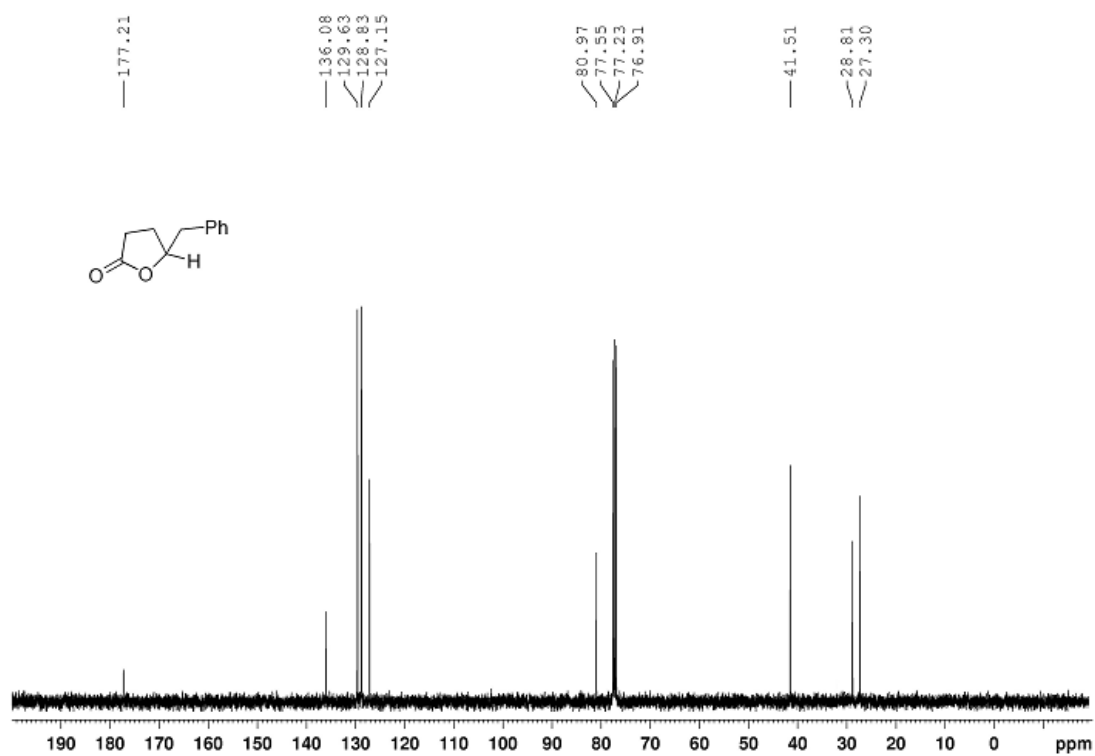

3w

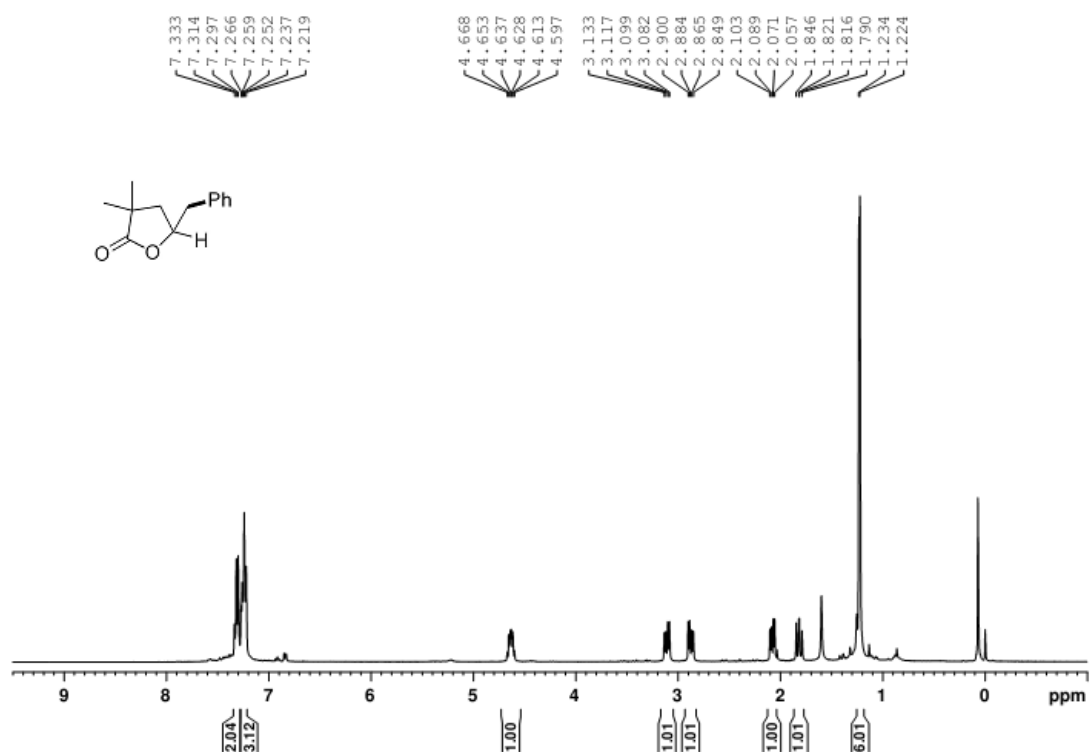

3w

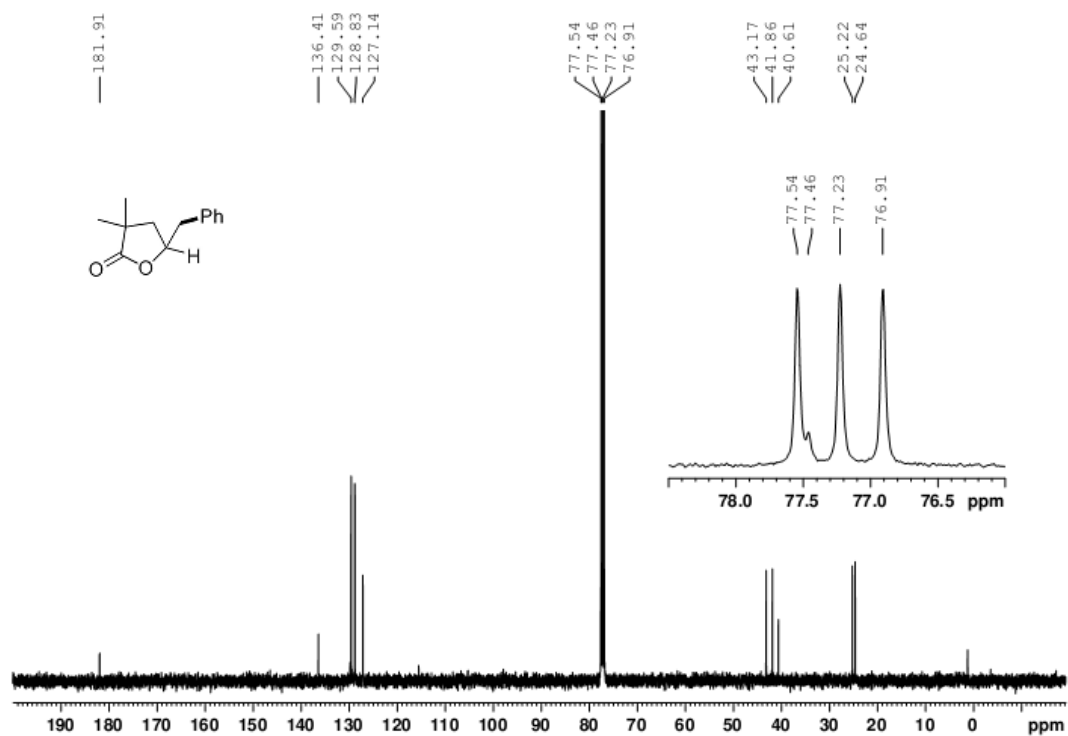

3x

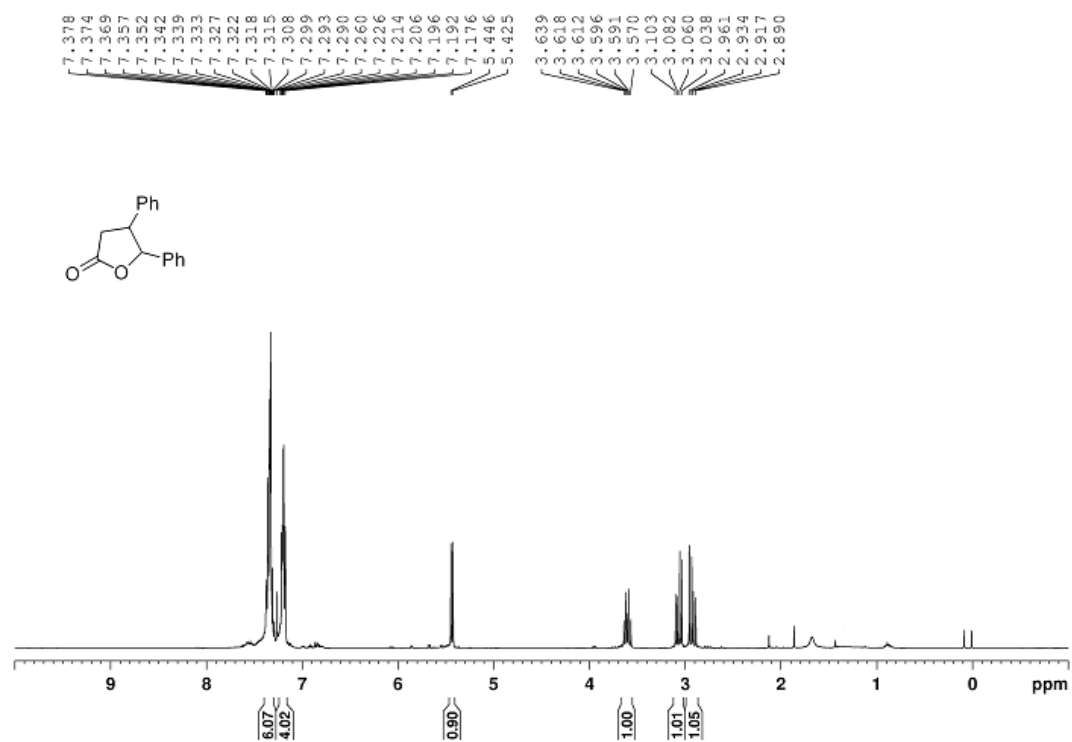

3x

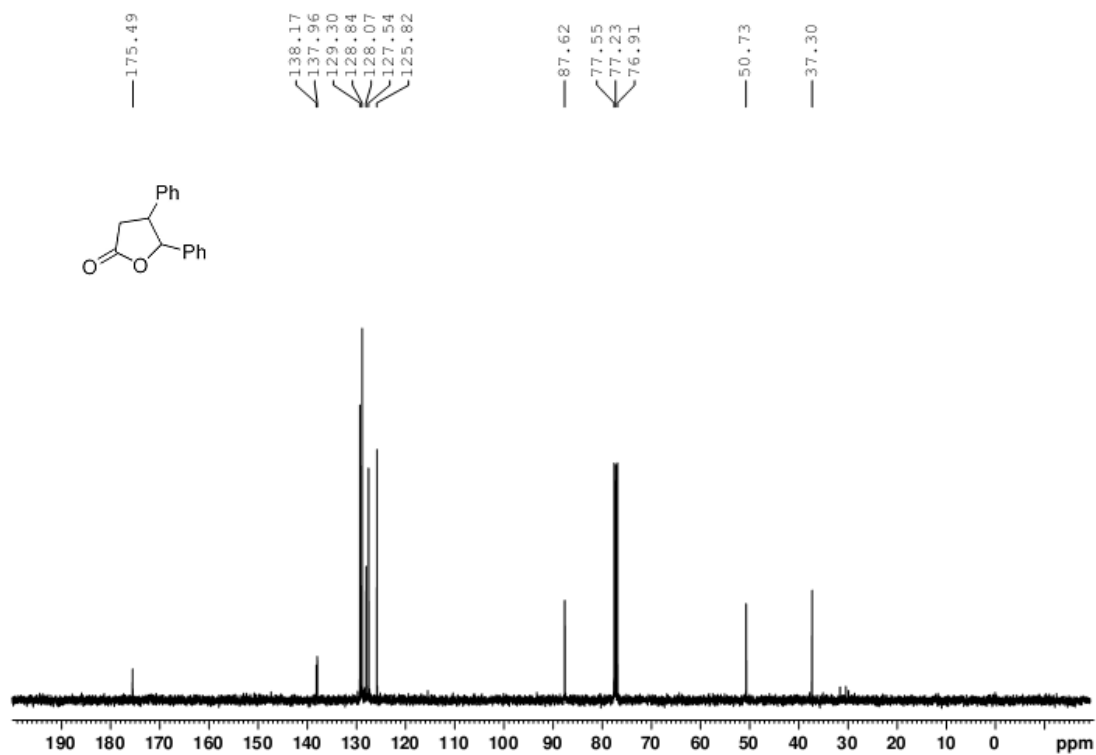

3y

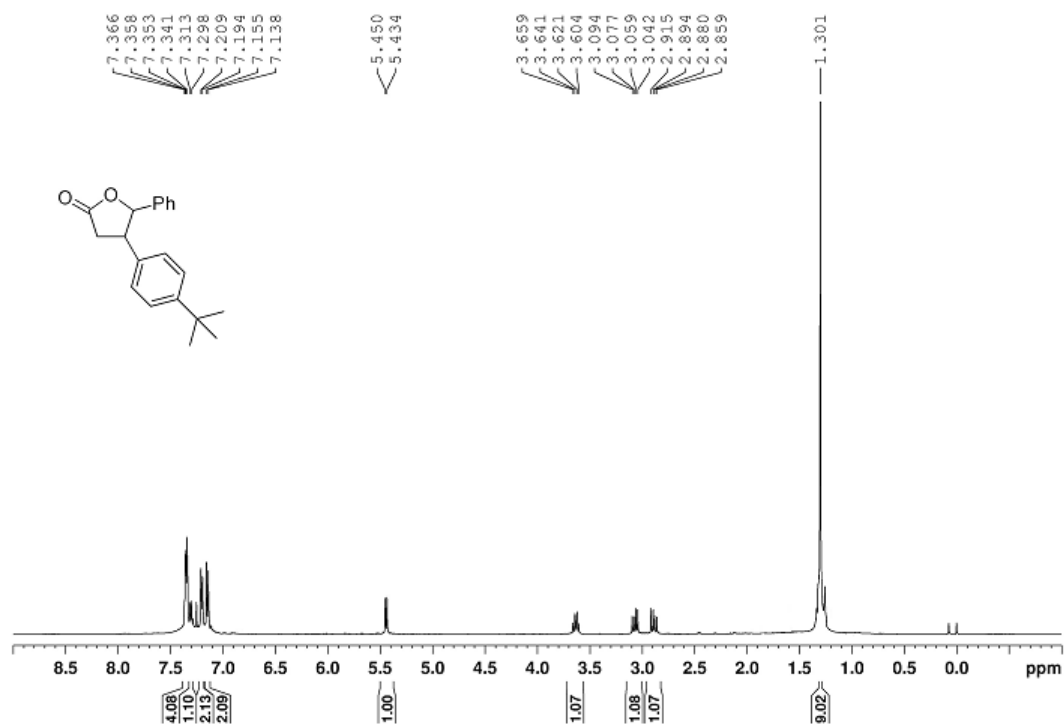

3y

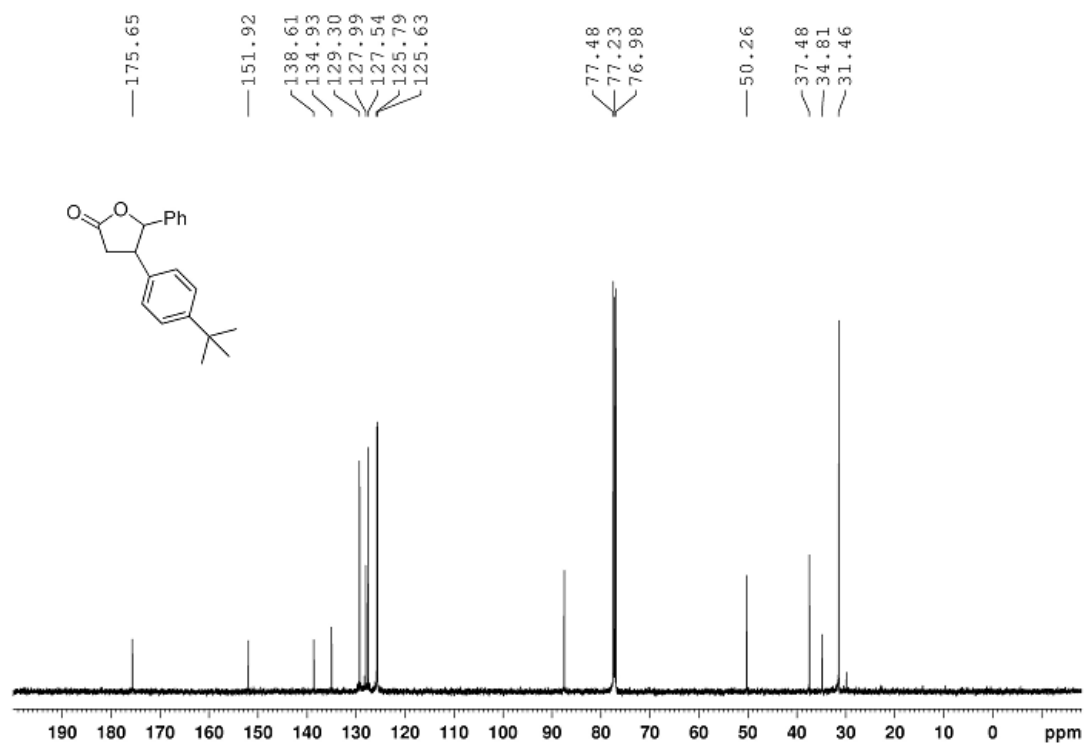

Supplement: c5ra04429d1.pdf [file c5ra04429d1.pdf]
